# Supplementary material for: Transcription-Based Prediction of Response to IFNβ Using Supervised Computational Methods
Source: PLoS Biol. 2004 Dec 28;3(1):e2. doi: 10.1371/journal.pbio.0030002 (PMC539058; doi:10.1371/journal.pbio.0030002)
Supplement: Dataset S1 — Gene expression values for all samples at all time points. This is the raw file from which all analyses were performed. (491 KB XLS). [file pbio.0030002.sd001.xls]

## Sheet: Sheet1
Responder	Patient code	Time point	Sample #	384-well plate #	EDSS	IFNaR1	IFNaR2	IL-10	IL-4Ra	IL-2Rg	IL10Rb	IFN-g	IFN-gRa	IFN-gRb	IL12Rb1	IL12Rb2	Tyk2	Jak1	Jak2	NFATC2(b)	Tbet	NFkB-50	NFkB-60	cMAF	GATA3	FOS	Grb2	Sos-1	CIITA	STAT1	STAT2	STAT3	STAT4	STAT-6	JUN	MX1	IL13Ra	IL12p35	BAX	Caspase 1	Caspase 2	Caspase 3	Caspase 4	Caspase 5	Caspase 6	Caspase 7	Caspase 8	Caspase 9	Caspase 10
good	1254729	t0	1347	1	1.5	5048.69	5379.29	5642.57	16838.7	6270.51	5727.53	214234	19262.1	29542.5	18450.6	14542.4	2686.13	13775.2	16231.5	24956	290343	8021.24	3501.75	1959.41	584.079	107511	6112.94	4692.5	10909.1	9629.58	6734.92	7912.42	19224.7	3175.34	8174.09	2057.52	12975.6	3776.46	5532.91	38147.1	18716.8	5983.52	12566.5	29311	10358.9	3327.22	18417.8	7271.35	7659.39
good	1254729	t3	1497	1	1	6348.16	11807.6	7451.75	16406.3	10015.4	8514.78	47352.9	17995.9	31849.7	21415.5	13951.5	2667.54	11815.2	18548.2	21100.1	345396	10275.3	6622.25	2156.22	788.498	50227.2	10625.7	5729.59	8714.68	16906.9	10931.2	9770.41	41358	6464.54	3603.18	12316.6	19706.9	4098.68	17996.1	51188.4	30148.9	14727.1	16066.9	59542.9	15050.5	8211.28	33326.2	8415.6	13191.5
good	1254729	t6	1641	1	1	6400.48	9597.28	4165.92	20340.9	8381.81	6778.5	55755.1	12444.9	28255.2	16824.7	12705.5	2892.28	9403.63	14892.3	17664.9	198325	6458.32	6752.8	2645.45	783.195	87603.5	6642.38	5467.47	11803.1	11994.7	9758.14	8569.95	31443	5694.73	7673.94	9519.59	17674.5	4348.23	13405	71850.2	30221.6	10706.1	11775.7	42385.3	13544.4	9359.45	22115.1	8787.21	11431
good	1254729	t9	1806	1	1.5	5013.43	11432.4	8078.45	19947.5	9965.85	9227.8	31500.3	15408.7	37118.3	27233.7	15061.5	3056.02	10169.9	31278.5	16469.9	217511	10978.8	7120.96	2494.19	772.521	72753	6011.57	5526.05	9895.73	31036.5	22300	13399.5	25490.6	8480.02	5467.72	26184.6	21951	5330.89	17674	89101.9	28228.5	15381.6	21679.6	103509	11098	16666.7	19965.3	8599.06	14420.4
good	1254729	t12	2013	1	1	6020.23	13598.5	8149.37	24265.5	12296.4	12134.8	22315.3	22430	38095.6	30240.8	17077.1	3978.51	12011.2	32764.9	17299.5	255417	12550	14236.6	2533.17	518.344	85224	5870.67	4900	9880.06	28329.2	22555.6	15198.9	26581.2	9059.55	8072.38	17907.5	26407.3	6343.09	11988.3	108206	43080.8	16224.5	27711.9	124517	14278.4	15853.8	26178.3	10116.5	17311.5
good	1030008	t0	1346	1	1	5357.15	10190.9	2411.84	23248.2	8550.9	8633.46	91043.4	18122.5	33518.1	19912.5	14195.3	3353.82	11621	16017.5	19437.5	281848	8205.61	10780.3	1288.68	559.537	126653	4696.51	3352.19	7367.75	10840	9264.32	10440.6	25500.8	4637	4200.02	3427.04	20716	2923.05	21848.4	76414.1	35244.3	10833.9	21936.3	54671.9	14933.4	19214	35569.6	11030.7	11448
good	1030008	t3	1475	1	2	5374.8	7311.69	1961.03	19474.1	6814.47	6059.29	68598.4	17588.6	30667.3	14985.9	10207.5	3161.57	11664.8	16180.7	20725.5	244095	10177.1	9359.64	1511.92	617.26	75155.6	5201.14	3297.96	6890.93	6209.07	6050.25	8655.72	22312.7	3495.69	3388.89	4208.59	22815.9	5730.95	13435.2	39434.8	29367.7	6945.05	14011.8	36344.1	17331.2	8002.75	27707.2	8812.67	9311.96
good	1030008	t6	1620	1	2	7936.74	15134.2	5113.4	23161.1	7364.86	11128.7	60655.9	41777.1	112852	31880.3	12343.2	5309.18	15417.7	76664.6	21729.7	325921	16950.3	16833.3	1721.35	615.628	302742	9970.91	5124.5	5177.15	61109.1	30863.6	17321.1	42627.7	4611.8	3494.88	35314.9	30662.9	5571.17	11195.3	79776.9	14499.2	9649.44	18926.4	52872.2	7685.23	3274.31	36986.3	54217.5	13395.6
good	1030008	t9	1768	1	1.5	4043.21	7967.42	1948.08	9881.05	4389.65	5782.63	22642.2	11519.9	33951.4	16039.6	7568.61	1866.96	6935.53	20707.8	7820.28	92778.5	5329.93	5237.62	1240.2	257.011	42304.9	3945.81	1021.3	1272.54	31413.7	14827.6	6423.53	10148.7	3141.26	323.867	7790.01	4914.85	4454.34	7156.65	52898.8	6445.49	4221.86	13733.9	38382.6	5613.27	4855.45	17514.6	3740.82	7932.86
good	1030008	t12	1957	1	1.5	6114.18	14784.9	2431.8	17889.6	7566.9	8480.14	21184	21049.4	63521.2	22342.2	9697.14	3366.03	9611.85	39876.6	12078.5	161432	12374.4	12434.6	2030.26	644.698	109523	11215.3	5292.68	5596.41	53959.1	39730.8	19381.8	22277.4	10172.4	4415.04	45067.3	33762.6	4452.97	4882.8	112006	16876.3	12381.6	27609	99887.8	10410.7	17594.1	34915.8	7935.5	18265.3
good	1030008	t18	2477	1	1.5	4695.51	10700.2	798.774	22215.2	7740.79	5581.67	28669.1	13179.3	25345.7	12473.5	9343.04	2805.38	9156.5	10600.5	15867.3	206280	7638.47	7756.6	1965.75	727.785	25146.9	5001.81	4191.31	7066.55	9105.2	8478.54	13575.5	24264.9	6618.96	3821.95	5344.77	14381.9	3015.38	4035.02	67201.8	15473.8	5777.17	17533.4	28545.6	12312.2	7551.26	41674.3	9446.31	10686.6
good	1030008	t24	2809	1	1.5	3135.57	7324.8	2370.14	15105	6422.86	4417.76	97458.3	8769.15	20591.9	10371.8	12110.2	2912.16	7915.6	9312.75	11111	124839	6646.71	8052.86	583.49	338.673	7584.18	1193.3	998.414	2617.15	5435.22	5901.7	9102.78	7904.65	2867.36	2006.03	1966.37	7751.64	5234.09	6784.81	58379.6	13082.5	3029.32	12644.9	25291.8	7934.58	4229.52	24525.7	4987	7858.61
good	1084056	t0	1087	1	2.5	3283.82	5744.32	1546.36	13461.8	9738.74	3682.35	19344.3	8112.71	12467.8	15689	15561	1824.99	9643.07	8418.76	18099.2	293123	6568.2	6736.89	1260.26	524.756	7002.75	2238.28	2425.83	3566.14	5940.79	4414.28	7657.62	20990.5	3128.64	6571.88	1587.12	10116.8	3452.7	3528.58	35458.4	13536.2	4376.89	10747	17657	9198.98	3527.1	27292.5	7150.85	7207.51
good	1084056	t3	1990	1	2	4475.75	9840	2264.05	12725.6	13199.6	4419.92	56030	11545.4	19086.9	19615.7	15499.1	2005.46	11771.9	13143.1	32562.4	459942	7631.44	5282.29	1968.48	737.835	9492.71	3308.91	3125.49	4030.96	10849.3	5704.43	8657.25	34099.7	3301.98	8176.82	5534.23	10535.4	3917.77	3108.93	19785.7	11935.3	4137.96	8814.4	20819.2	12411.8	4448.8	31596.2	5402.61	6738.24
good	1084056	t6	1330	1	2.5	5001.23	9768.92	2405.73	14436.7	9611.62	5631.79	37978.9	16955.3	30854.7	16239.3	14064.7	2213.66	12924.4	18273.4	29320.3	428948	8642.11	6007.44	1701.76	637.142	17083.3	5190.09	3769.98	6129.67	10816.1	7792.48	8428.81	31332.4	3518.02	12341.7	7741.63	16708.9	6043.86	10366.2	46649.2	11327.2	7315.23	10575.6	33976	7608.99	2461.32	26131.4	9274.13	7485.38
good	1084056	t9	1477	1	2.5	6606.58	10554.8	2891.33	17344.7	14421.1	7120.96	112420	22513.4	31784.3	25514	20809	2877.52	17850.9	19727.6	43663.1	713339	15436.5	6955.96	2676.07	1008.51	47099.2	6701.52	4915.99	5098.55	11928.2	6075.75	9799.21	60161.5	2947.87	10665.6	5383.93	19644.1	5147.61	8803.19	38249.6	25612.6	12226.9	12511.7	27393.8	10325.1	4040.21	27228.5	8780.84	7996.49
good	1084056	t12	1618	1	2.5	6718.77	12321.6	3827.62	19852.5	10663.3	7880.95	48681.7	21901.4	36631.3	20150.4	15105.9	3179.87	14188.2	22537.4	30853.2	345646	11153.6	9318.55	1356.27	587.833	27848.4	1143.43	1168.62	2025.09	19306.5	6890.71	6174.63	20438.9	3160.43	3905.01	2452.61	6047.44	4186.74	13549.1	60912.7	26661.7	12521.4	13361.4	42415.3	9419.77	6162.4	30014.7	10058.9	11103.5
good	1084056	t18	1926	1	2.5	6308.55	13257.9	6557.15	17166.2	9926.06	6958.37	20935.5	16183.2	36214.9	29194.3	17172.9	2877.65	10675.9	25454.6	22831.9	276275	9272.08	9854.06	2171.79	701.146	20387.5	6772.11	4292.28	5938.6	30872.8	22917.4	16136.9	26729.6	8886.29	15539.9	23308.3	19957	4023.4	22852	110786	19391.8	12480.6	20502.3	84190.5	9085.96	11324.7	22024.6	13807.1	13420
good	1084056	t24	2438	1	2.5	3074.35	4408.3	1044.1	13847.1	8292.95	2653.92	26844.5	5805.97	8813.73	13256.9	13213.8	1468.95	7141.19	5980.06	17192.3	162752	4615.32	5500.12	2050.18	768.658	11539.6	3599.11	3194.2	6132.11	4774.19	4410.33	8335.03	19647.7	5912.73	12779.7	2853.08	12573.9	2575.27	10971.7	47996.8	12033.9	5318.11	11069.6	20475.4	7506.5	4068.87	16885.4	9411.81	5753.59
good	652674	t0	1163	1	2	2306.89	5572.46	3770.99	10494.9	5438.05	2848.58	22014.5	6817.79	13465.4	13961.4	7422.88	1753.69	6578.86	5682.35	16025.7	144913	2964.34	4212.51	1539.61	557.543	12343.2	3063.96	2628.64	4444.37	2623.57	3279.52	7139.41	10655	5275.45	22644	1555.63	16530.5	3718.67	14887.5	54981.7	10738.1	3347.51	9325.36	17298.5	7894.34	5164.03	16454.7	7561.35	4572.55
good	652674	t3	1269	1	1.5	3618.62	11448.3	7571.65	17571.8	10759.1	5845.98	79965.6	13428.8	35574.4	42139.7	12343.3	2919.71	9836.98	24402.1	27846.2	498126	7651.67	10698.9	2909.12	692.34	57997.7	5276.99	3241.53	2986.91	33993.3	22759	17471.9	31346.3	6561.68	43671.1	18536.5	26868.7	4165.98	17194.8	90597.5	16881.5	13007.8	16518.3	53677	7944.16	9591.44	63301.6	8803.33	13571.1
good	652674	t6	1413	1	1.5	3327.84	9858.99	4645.02	19761.8	10934.8	5294.03	31216.8	12819.3	21951.1	21478.6	8626.74	2047.73	9956.91	10718	27532.5	291905	6556.58	6838.58	2314.87	757.345	5868.33	4650.38	2800.66	4414.47	5467.7	5300.07	11000.8	22758.5	5070.68	40938.5	3192.71	20325.2	3956.54	5788.02	52769.6	5772.22	4327.5	10616.6	24754	6750.74		18234.7	8928.67	5360.46
good	652674	t9	1576	1	1	6413.83	12855.7	7866.41	25259.5	13339.8	10259.7	60851.1	29666.7	56710.2	35477.8	10290	3978.51	13890.2	23114.9	32398	489781	13321.8	10362.9	3652.27	1012.16	123793	10594.8	5288.93	8153.82	14601.4	11860.5	17998.3	34174.2	5593.24	84024	7396.98	31173.9	4605.89	9991.61	83245.1	17831.5	6821.3	14784.5	48453.5	7741.83	2188.31	36185.7	14234.8	9333.1
good	652674	t12	1766	1	1.5	4493.11	7192.01	5328.2	12891.6	6088.92	7836.51	40825.2	17880	49802.7	21542	9761.92	2715.57	6934.41	20446.9	16370.8	209786	6741.53	6852.97	1940.58	520.128	43133.5	8093.4	3903.86	4715.61	19329.8	8313.82	9759.45	15857.6	3422.84	50670.2	7160.5	4902.57	3210.66	5938.87	83032.8	6764.71	3639.61	12975.4	49691.9	4657.9	5470.4	25553.3	9928.76	5781.15
good	652674	t18	2212	1	1	4229.71	17027.4	29573.1	18843.2	8872.03	5097.33	166292	16671.8	59812.6	22043.6	14925.9	2600.03	11474.9	9727.4	27926.8	221482	14677.5	15035.5	2582.64	773.059	42108.6	4365.32	1449.26	2872.98	16427.7	8038.77	11008.6	14732.9	5299.22	30076.9	5562.52	12531.8	6949.13	10162.8	68156.4	11238.3	6779.24	11523.8	48820.4	6203.61	5896.7	26975	6134.11	6155.67
good	652674	t24	2717	1	1	5866.45	20099.4	5875	15595.1		8367.6	22938.3	12600.2	36495.7	39993	15288	3527.32	10718.8	23472.9	20123.5	178510	7662.03	13803.8	5434.13	1746.47	22715.2	11467.1	5014.16	6125.44	42477.2	34061.4	23538.8	26797.9	17218.6	80763	30025.2	38095.7	5773.49	10988.1	145653	13174.9	5963.45	14614.1	70810.9	9017.54	8356.84	23243.9	11399.6	11552.9
good	1013630	t0	71	1	1	2232.51	9492.03	32246.6	11144	3671.16	2478.73	8642.71	9233.05	12741.2	10707	10910.2	1660.24	4299.66	5477.2	5848.2	36359.4	2815.68	8592.87	700.764	538.756	68139.4	4316.57	2266.58	7641.16	9159.39	3892.63	7874.74	8480.19	8114.78	29841.8	7316.11	23672.8	6308.91	8128.58	57684.6	6203.4	4202.78	7394.52	14524.8	4743.38	4029.16	24888.1	5535.77	7843.07
good	1013630	t3	148	1	0	4934	10820.2	4080.81	23571.3	9649.82	4234.52	11009.9	9693.75	24532.1	16784.5	13542.7	2052.34	7504.23	8466.71	13213.4	121155	7936.95	8414.15	1732.69	963.919	25076.4	5666.83	3582.49	6934.52	8662.51	8444.51	12667.1	19852.5	9654.62	25348.4	8088.71	30394.8	4074.22	9939.59	67780.1	11969.3	7169.85	12706.8	28364.7	10182.4	6661.43	30216	6705.25	9087.77
good	1013630	t6	269	1	0	5899.61	15009.8	2441.64	40163.5	11614.9	7236.5	14137	13755.2	26673.2	16024	11915.5	2483.87	9641.29	9785.4	17608.8	95455.5	10328	11281.7	1447.55	1010.12	32673.8	4876.12	3654.48	8052.17	5375.6	5834.17	13330.6	28240.4	8774.83	22861.9	2649.72	41967.2	3388.31	6182.87	43957.2	20897	9876.52	10858.8	17685.5	13471.5	3218.62	26951.8	9690.22	8978.83
good	1013630	t9	457	1	0	5630.97	16899.8	621.264	31155.5	7816.01	6505.28	19027	14026.2	18956.1	22335.6	14760.8	2650.6	9971.05	12202.9	24921.5	183421	7464.64	11625.5	1491.88	864.529	29788.3	3385.18	4047.34	7004.44	9322.18	6993.38	13528.8	27408.3	6136.57	19932.2	2972.32	20807.5	4958.14	6563.99	42577	18882.7	10946.1	12510.9	16175.8	10776.2	4367.6	18803.1	10862.5	7570.99
good	1013630	t12	583	1	0	5321.6	14371.6	1118.59	27632.6	9772.02	6326.76	12887.7	14451.4	38894.2	18982.3	6924.87	3186.07	14411.5	13774.8	27232.3	216255	10821.9	11588.7	1548.37	872.307	25840.6	7451.25	4193.74	10343.7	7692.9	5999.88	13061.2	27269.6	5418.8	45580.5	1614.47	36725.4	7180.53	9289.19	55200	13600.8	8544.33	8616.12	14529.7	9860.74	5208.19	21248.9	7742.66	5690.26
good	1013630	t18	976	1	0	5455.3	8403.08	956.206	24201.1	7871.45	5843.29	13677.5	17416.3	37242.7	12241.9	11146.3	3514.13	13363	19866.1	26122.5	143814	6644.92	8160.8	1428.63	904.972	87873.7	8821.54	3797.86	7518.02	9211.11	4544.54	9765.29	24080.5	3889.91	26496.9	2138.48	25044.2	4223.73	17226	49592.1	14140.1	5392.98	9645.24	16261.1	12196.9	4486.39	26890.1	7354.57	7000.24
good	1013630	t24	1256	1	1	5096.47	14978.6	2344.36	19373.1	7077.64	4347.77	8359.64	10400.1	21488.9	12307.7	8709.56	2383.33	5736.81	6172.93	12061.6	142192	10282.9	9497.71	515.595	427.145	20715.6	2207.04	1517.73	3106.34	8498.81	3302.83	4284.56	13185.6	2295.74	10889.6	2310	12383.2	4385.57	10264.5	66330.1	14456.1	5812.54	9526.44	25785	11616.7	5579.11	37980.8	7980.36	9233.1
good	1185163	t0	516	1	2.5	6202.18	22537	3501.27	17223.9	10308.7	6496.93	16553.2	13151.4	19789.5	14620.3	7776.17	2561.95	9253.78	10711.5	18453.3	145332	6595.99	11288.7	2832.24	1037.4	14321.2	5238.55	3752.69	6160.07	5541.41	7858.92	10263	17573.2	10267.6	5350.06	3662.09	22059.1	6469.15	13340.6	61084.4	15007.7	8241.13	16472.4	29898.5	13596	5975.28	25408.8	7865.22	9934.98
good	1185163	t3	710	1	2	6348.72	19852.5	5017.2	23011.5	10193.9	6866.33	16025.4	14679.2	27510.2	12359.7	11525.4	2976.9	7981.92	10847	16957.4	134194	8355.28	12817.6	1723.45	666.218	40643.3	4835	3578.91	4453.62	3938.3	7122.64	12477.3	17621.7	11175.5	8169.14	5874.8	26460.8	4071.4	21421.6	85559.3	11490.4	10888.7	13871	33244.1	12804.3	5650.45	28476.7	8847.24	10640.8
good	1185163	t6	883	1	1.5	5305.63	16540.4	3153.05	30251.8	15526.5	7970.88	18907.2	14733.8	25440	21177.6	17733.2	3805.61	12205.3	14597.3	22506	184934	13355.5	13459.3	2480.98	912.937	46216.6	4197.25	4190.35	7291.19	5465.1	9526.95	15955.8	22607.5	10115.9	9299.31	7002.27	40073.5	5485.35	8253.38	85461.6	15884	7234.57	16568.1	31847.4	12554.2	2661.19	36126.8	10496.3	9677
good	1185163	t9	1050	1	1.5	5470.67	18068.4	5383.07	34879.7	18569.1	8163.96	47091.4	17315.7	19589.9	23734.3	22947.1	4277.12	14536.5	15664.8	37837.7	332949	12020.2	26513.9	2274.02	922.793	6113.46	5734.66	3125.42	7253.8	6824.09	8971.32	18736.9	36132.8	7972.24	2609.96	6731.66	26681.7	5968.34	6621.08	58267.2	17723.9	9498.39	13228.3	28810	10912.3	2108.02	51422.1	10268.8	11590.9
good	1185163	t12	1189	1	1.5	9920.4	25040.3	7742.9	26814.5	12429.8	10703.3	47731.5	24470.9	43392.8	23169	17046.6	4273.17	14304.6	26387.5	27829.4	266366	12811.1	21468.9	2337.89	733.107	51587.7	7422.64	6177.02	7058.07	8700.62	13403.7	13387.6	23852	8270.27	9844.64	14826.7	35843.6	6668.29	10168.6	115681	14452.4	17049.4	14569.2	51727.7	12509.1	6615.22	45130.7	13040.1	13036.1
good	1185163	t18	1487	1	1.5	10719.5	27469.3	9808.8	22734.8	15464.9	12565.2	57725.5	33990.9	43521.4	25545.6	11909.5	3253.37	11370.2	39804.7	36509.8	381719	17097.9	12220	1853.45	639.357	3731.18	6450.59	5278.68	6477.1	13134.2	11843.6	14049.2	27547.4	3873.97	5214.41	14101.1	32704.1	7375.3	8717.17	111379	27597.7	20024.4	15823.2	53239.1	12229.9	6502.24	59292.4	12033.3	15553.9
good	1185163	t24	1863	1	2	5966.24	12811.6	10930.9	18561.1	9996.41	12910.6	33496.1	32287.9	53567.8	22568.6	13070.9	3674.89	11372.1	49718.6	17403.6	211191	10037.3	17714.7	1676.15	555.824	56261.5	4868.46	3349.12	3609.69	24186.1	15889.3	11941.1	11340.2	3130.72	5348.2	18721.1	18829.9	8022.6	11463.1	168888	22934.2	11403.9	24378.6	87008.3	11397.3	8139.59	32557.3	10531.1	18251.2
good	1153769	t0	715	1	3.5	3004.74	3864.13	3019.96	9930.83	5999.87	3579.84	33721.4	15174.7	23122.2	11620	7863.26	1995.04	9974.66	7855.2	27760.9	268966	3646.43	2568.38	1607.93	893.296	29243.1	12519.4	3167.8	4877.37	6595.55	4515.33	6358.25	16079.2	4482.13	7819.44	1921.45	19758.6	7136.31	9560.9	58181.6	9725.27	5795.07	10003.9	7154.57	8842.54	4481.87	21014.1	5507.42	5983.05
good	1153769	t3	900	1	3.5	3434.29	5139.19	1478.03	14556.1	8164.24	3727.88	55716.4	8820.33	15611.2	11519.9	8198.4	1800.64	6938.43	4665.28	22406.7	230485	4180.58	4353.04	2695.09	1074.93	48681.4	8537.82	3895.09	4829.5	4102.88	5154.9	6066.7	24369.7	6000.75	8690.96	5990.96	13968.4	5384.47	8867.03	37576.9	13154.7	6705.78	8969.16	7080.51	9444.27	5095.6	29267.7	5233.85	6964.41
good	1153769	t6	1010	1	3.5	1599.02	3755.04	1454.73	7244.88	4861.51	1151.4	19713.3	3039.91	4417.07	7782.66	6398.35	1199.48	4768.54	2277.57	16767	130469	2318.16	2038.83	1601.91	765.022	2662.46	3354.71	3299.16	4169.78	2349.71	2258.25	3172.06	13925.6	4807.05	4489.61	2775.52	2934.97	5310.27	3232.46	19722.6	7261.5	8179.35	5275.46	3720.12	6439.45	2275.03	18731.9	3145.68	3957.74
good	1153769	t9	1171	1	3.5	983.517	1602.54	911.956	4520.08	2439.09	1358.19	12529.2	2479.16	4655.32	5235.18	4128.93	683.539	1855.64	2224.43	5429.62	75480.3	1577.03	1765.41	599.861	301.038	16603.1	2168.21	2032.25	1292.76	1656.99	2371.87	1794.61	6947.72	3149.16	3073.05	2937.13	5890.7	1333.34	4359.51	17316.3	5807.62	2977.73	#DIV/0!	4851.14	#DIV/0!		5290.47
good	1153769	t12	1297	1	3	1156.13	1683.14	1550.95	5935.83	2848.09	1626.14	12738.4	3013.6	4706.04	5303.77	3663.47	697.097	2243.3	2429.3	6236.89	74465.4	1951.54	2021.19	431.789	189.804	11001.7	1318.47	1671.79	1279.76	2451.17	2238.83	2026.13	6401.41	2577.98	1205.63	3661.24	6290.8	1321.68	3239.98	15333.2	2434.69	3248.32	4368.59	5085.85	#DIV/0!	2331.2	4335.66	2291.05
good	1153769	t18	1525	1	3	1329.8	1932.96	403.404	4762.22	2473.52	1805.2	7372.57	3822.68	8129.76	6955.82	4601.75	711.16	2307.93	4072.22	5212.95	71344.2	1903.92	1754.18	473.136	187.293	2385.85	1444.53	1383.55	698.926	4357.12	4163.75	2352.48	6631.36	2334.93	962.094	5300.08	6611.75	642.192	3678.35	16530.4	5667.25	2467.3	5266.75	6457.29	#DIV/0!	4186.24	10976.1		3319.7
good	1095366	t0	1383	1	2.5	4137.6	5328.49	3765.54	18709.6	6627.35	5417.68	11337.6	17176.5	21339.4	14384.8	9056.6	2164.7	5457.07	6796.52	17848.4	225906	5602.36	6479.86	885.076	374.967	14783.8	4890.06	2658.34	4893.1	4790.78	4235.44	5936.47	23657.4	4283.85	874.525	1145.18	17127.9	2549.05	11843	57748.6	18243.7	9293.47	11490.6	13687.5	7592.34	4152.99	14630	9806.69	6684.31
good	1095366	t3	1537	1	1.5	5260.67	7068.03	3738.38	18909.6	6746.3	5951.25	44982.5	16394.4	38376.4	19095.8	15633.7	2556.96	9642.32	11403.7	20547.6	247231	6530.55	5427.71	1642.98	559.595	69440	6956.67	3086.84	3960.4	9297.08	8632.65	6252.55	19867.3	3687.14	1738.73	6219.83	19934.3	4220.6	17912.6	76218.2	15719.3	5396.63	13449.7	33742.1	9604.28	4986.08	12141.7	7728.23	7008.93
good	1095366	t6	1685	1	1.5	4075.46	4048.35	3531.35	14244.9	3505.15	3598.16	10447.6	14006.4	28929.9	13530.8	6870.18	1995.84	5439.86	11481.9	11062.2	81356	4327.25	4360.57	1138.64	342.914	68336.1	2137.7	1174.46	1489.21	12831.5	9761.28	4262.33	10506.7	3151.45	839.118	3085.35	6167.94	2324.99	16122.9	79566.3	10951.7	5654.5	6856.81	12538.1	5238.67	5925.83	16965.4	6931.33	8139.9
good	1095366	t12	2070	1	2.5	3422.67	5525.54	4484.24	14054.3	5061.44	3790.08	7782.57	8829.95	26851.4	16642.8	8341.31	1925.37	5179.52	13847.1	9983.38	97033.7	4607.9	4323.99	1672.06	481.807	19844	6245.03	2771.53	3940	22902.7	20211.6	7165.35	15468	7010.38	1932.68	17319.6	16464	6338.93	6486.29	90873.9	8483.62	5128.5	14681.1	38662.4	7171.87	4130.44	17555.6	9996.08	8219.5
good	1095366	t18	2605	1	1.5	4029.31	4862.1	1112.21	14146.7	4862.14	4040.43	15401.3	10519.1	21503.6	9909.89	5352.35	2017.22	5423.5	7297.89	11981.2	144433	5172.74	5867.64	922.686	430.858	33607.5	6574.45	3085.16	4844.77	5023.33	6699.16	7443.51	12479.6	6559.43	3933.81	4216.24	20098.4	1748.85	12315.9	78339.4	7921.79	4519.98	15078.5	31387.8	5680.2	4834.12	11483.8	7869.37	6747.51
good	1095366	t24	2968	1	1.5	2675.13	4472.81	12043.6	12595.4	4216.1	3044.17	19248.3	6451.03	20274.5	13268.3	9439.49	1836.72	4379.27	9929.64	7505	55783.2	4699.26	6322.95	522.345	131.205	7062.25	1583.49	697.86	1033.86	11311.4	13515.2	6197.87	1389.36	2711.61	1456.47	3845.1	5651.74	5259.34	12237.4	77765.6	5923.43	4683.81	13747.2	30286.2	4717.69	6930.61	9954.79	6345.56	4824.99
good	569479	t0	389	1	4	2748.42	5553.3	219.468	19962.6	5763.43	3722.66	82862.4	8732.39	38902.9	24454.2	11459.5	1719.79	6747.27	8614.16	10965	71204.8	8131.38	13794.9	921.056	331.779	20712.2	3234.5	1249.98	2459.49	10550.8	10612.9	7449.25	7919.89	4383.65	4271.98	6275.66	14101	4949.75	10709.3	42600.4	11078.3	7199.92	8624.46	14828.2	7976.38	5054.58	24062.2	7226.45	5785.32
good	569479	t3	572	1	4	3221.07	5564.05	904.109	19031.7	6115.95	3835.99	18450.4	9730.12	19044.9	10868.7	9147.42	1855.93	5912.5	6129.84	14302.5	123713	5086.72	6024.67	1223.92	535.606	51051.5	4269.07	3127.99	3908.67	4954.29	4615.43	5461.42	16033	4007.76	14602.3	2671.62	9811.96	3376.77	7997.99	56962.6	17989.8	7339.83	8525.22	28604	9550.72	4751.31	29476	9382.51	8340.79
good	569479	t6	770	1	3.5	4871.55	8336.94	3739.91	21249	5033.2	6060.86	9340.12	18838.2	32799.2	9020.65	9549.38	2703.81	6257.4	11789.7	17224.3	112148	7060.73	6567.3	1599.84	767.297	57628.9	6394.48	3299.91	4989.52	9066.44	9575.06	6010.5	19118	4607.52	21118.1	6661.71	18007.8	6484.24	9008.45	98119.1	10864.2	9742.62	15980.1	38635.3	8850.68	5326.05	38908	12513.5	13494.2
good	569479	t9	948	1	3	5808.39	6064.64	5231.54	19811.7	5957.68	6059.09	17028.9	22776.9	60390.4	14462.3	16060.6	3486.79	9737.21	27551.9	17607.6	200167	7906.12	6071.9	1934.63	927.58	18218.6	8799.28	3984.82	4699.77	30592.3	22010.7	10775.4	21037.3	3921.38	15145.3	32596.7	15044.7	5306.59	6700.95	41527.2	8819.46	14860.1	7274.82	34275.4	9996.93	4122.36	32182.6	6435.67	9070.87
good	569479	t12	1051	1	3	5657.76	10769.1	4593.96	17507.6	5684.05	6581.91	14756.4	17972.1	30578.1	12319.5	10838.7	2335.42	7895.18	10286.8	15089	182155	6979.37	6344.33	878.252	525.316	9177.18	1212.1	707.402	975.073	11944.4	5453.75	3957.97	15448.2	2630.67	2667.03	2090.15	4213.98	4353.07	11316.1	60822.3	14683.8	12273.3	9902.07	30346.2	9516.26	4774.37	10114.4	9100.04	7760.23
good	569479	t18	1317	1	1.5	4136.13	5739.13	2428.3	26841.5	4839.9	3920.5	7732.64	10452	19031.7	11780.4	8846.78	2297.16	5534.38	6523.87	11987.8	101501	6958.42	7993	1649.52	869.262	18462.8	5170.57	2907.8	5617.92	7558	10153.6	6415.58	16680.8	6839.87	15023.5	6995.48	11765.8	4053.76	14299.1	85542.6	15423.8	10332.2	12377.5	36095.7	8439.6	6841.6	9308.51	8350.68	10245.7
good	569479	t24	1652	1	2.5	3659.3	7101.73	2474.09	19385.3	4444.83	3688.07	5170.11	7904.55	22107.5	12684.5	7543.02	1701.45	3985.65	9658.42	8646.12	54734.6	5718.42	7152.05	1483.37	646.308	39625.2	6341.49	3209.77	5289.22	21353.8	17900.2	9233.87	13140.1	9437.29	15805.5	20728	13005.3	3612.11	15673	91416.2	15054.2	13437.9	15260.7	46368.6	7841.3	8125.18	12410.5	8515.28	10180
good	1084785	t0	1546	1	1.5	2964.6	5075.44	7301.7	19664.3	5076.77	3581.56	38130.8	7102.37	19087.8	13150.7	8735.92	1957.07	4543.83	9887.05	9764.4	78358.5	5705.99	7740	1283.2	543.098	69951.6	4687.23	2234.48	4126.68	13947.7	19984.5	7780.89	10036.7	9494.88	24125.9	17100.3	15517.9	6332.36	6813.7	58870.4	14779	9301.66	11680.1	15029.6	7516.99	4988.32	8545.1	6807.07	6558.03
good	1084785	t6	1763	1	0	2821.72	3967.47	291.682	16599.5	4929.41	3461.86	17533.7	8970.45	18631.4	9141.13	5443.35	1899.14	5041.84	5839.69	9978.07	126365	4921.49	5047.96	518.954	289.33	17273.6	3440.22	1759.4	2644.8	1779.8	5000.25	5445.23	9065.93	4063.99	3018.3	924.436	25947.4	1562.59	17535.1	104384	24630	17184.5	13924.9	36557.7	11184	7381.97	15191.3	8447.68	10556
good	1084785	t9	1923	1	0	4576.7	6215.79	1790.51	20548.2	7851.5	6783.1	37707.2	14627.4	36716.7	14744	6701.64	2873.44	7525.5	8943.41	19375.6	297673	7650.32	5993.26	1014.72	462.16	49609.8	4888.07	3439.31	3749.92	5596.39	7023.13	8531.03	20311.1	5672.3	4853.49	2993.03	33092.8	4660.41	22750.5	83673.5	20397.4	20640.8	15603.8	31617.7	9641.74	6790.68	14442.3	8389.57	10129.9
good	1084785	t12	2213	1	1	3670.31	7395.39	14231.5	19734.4	6516.18	4763.47	164484	18828.2	67428.6	10099.8	9952.36	2365.78	9011.46	8519.03	11070	141465	11541.8	11247.1	888.069	516.353	72519.4	6241.48	2491.64	4565.89	6539.96	7467.38	7149.29	14204.7	4831.29	10108.1	6008.37	27788.4	4257.63	19541.8	58873	10389.1	13259.7	11859.2	25949.2	7242.16	7211.36	8784.77	4313.19	7453.79
good	1084785	t24	3093	1	1	4837.23	6831.48	1035.5	18663.9	6581.62	7987.3	17496.5	18695.4	38297.8	10908.5	7895.31	2429.09	7833.01	9655.21	16735.7	141226	6789.32	4324.98	950.919	564.883	28285.7	7624.18	3905.16	4916	5501.51	5659.6	6686.11	18627.1	3835.19	3649.54	2729.84	25204	4039.85	11461.7	49876.6	11906.6	2679	11915.9	9628.75	9644.27	5898.2	6307.21	7025.25	8227.95
good	1159263	t0	410	1	3	3956.69	5918.27	1644	21378.1	7264.45	4185.21	111199	9696.62	22098.7	24784.2	12761.7	3035.88	6447.03	7574.15	16564.2	264842	6495.13	9028.5	1456.24	754.903	54814.3	3152.15	1594.44	3748.65	10675.2	6896.75	4348.93	15911.1	5506.81	17891.4	1052.32	9001.46	5758.84	4501.07	50033.7	13610.5	8051.68	10453.2	23925.2	7457.04	4157.04	16880.7	8996.59	7234.33
good	1159263	t3	622	1	4	5092.83	11118.7	1221.26	20945.6		4375.42	38287.8	10200.4	33639.4	24375.7	17229.5	2677.28	8440.21	7113.67	21263.4	214648	6542.23	6643.97	3343.28	1763.56	74166.8	10258.8	5502.17	7614.15	9427.54	13848.3	15224.5	30486.7	18432.7	39700.8	29290.3	28065.2	5060.56	19028.4	68934.8	19597.3	9786.86	12033.7	24827.5	11242.3	6861.55	13589	8322.92	7370.64
good	1159263	t6	750	1	4	4198.64	9925.45	3844.34	16895.8	7875.75	3268.75	13897.2	8337.58	16979.8	17423.4	11515.6	2010.29	5083.17	7325.01	12691.8	148776	4745.88	7757.64	2146.04	801.94	26658.2	7984.13	3655.9	3318.59	12735.9	17061.7	9563.5	20318.8	14365.7	39212.2	23999.3	20989	4205.72	10472.4	79928.2	16190.9	12743.7	12323.6	50090.8	9495.35	9059.1	12726.2	12982.4	8646.42
good	1159263	t9	949	1	4	5460.65	11236.8	3460.2	25280.4	12482.4	6092.8	17736.7	14488.6	31309.4	35836.6	15458.2	3369.05	7148.28	15568.5	15286.7	231813	9990.99	12823.3	2849.94	1096	13101	11165.2	5032.63	6183.3	25073	33205.4	14508.3	23465.3	14916.5	33390.5	30396.7	33350.4	4481.22	28726.8	108264	28557.9	23263.8	15456.3	102538	12910.8	17315.8	18764.8	14865.3	16904.5
good	1159263	t12	1059	1	4	4891.77	9557.62	5982.3	22033.8		4894.09	22811.8	12215.6	13959.9	29524	19223.3	2981.76	6503.04	16251.7	16185.7	241426	7037.98	12317.8	1889.64	735.651	68554.6	6753.4	3588.36	3539.04	26685	26717.3	11072	20148.2	14123.9	30602	31598.7	18806.4	6205.85	18666.6	145459	22257.6	14106.9	18699.6	86697.9	10587.7	14505.4	25283.6	10992	18407.7
good	1159263	t24	1666	1	4	5140.1	9198.23	5585.74	31136.4	12024.3	6368.72	29241	13646	40439.9	38137.1	11776.1	3235.55	6427.25	14930.6	20785.4	141226	7336.1	11110.9	1764.62	885.343	34214.2	8558.7	3712.52	5326.65	19586.9	27811.1	12467.2	15876.4	15431	46009.4	20729.4	20324.1	7205.27	25064.3	147000	19176.9	7677.91	18955.8	73012	10583.8	11455.6	18369.8	13243	15938.8
good	514775	t0	78	1	2	4334.7	9248.9	6807.11	18224	6344.94	5484.83	50839.5	18173.5	6300.8	18072.3	14075.2	3766.85	7742.8	9832.77	12283.3	210636	5119.42	8379.33	1293.08	555.739	85355.9	7561.52	3866.16	6923.88	7119.06	9013.19	6851.98	18093.9	7087.89	24478.5	4629.89	22542.8	8548.25	6911.6	59430.2	6553.09	4623.87	6420.33	22538.5	5595.51	2912.96	14408.4	6840.35	8060.88
good	514775	t6	260	1	1	5418.28	10167.9	5992.28	16003.8	8171.67	6476.53	61373.1	43410.1	56425.7	15323.9	18899.2	2865.65	10420.5	13955.4	20572.1	336415	7334.27	5054.64	1660.1	522.869	39966.8	9827.81	4940.35	2286.16	14331.4	8350.02	7001.59	31895.8	8037.07	16776.7	10069.6	14604.6	4149.17	10733.9	56917.1	7238.32	7771.61	6712.26	32434.1	8390.31	4975.2	22282.4	6249.92	12431.6
good	514775	t9	465	1	3	5013.89	9412.11	7048.39	17621.4	9485.96	4284.81	52717.4	7050.35	27866.9	15264.4	17584	1961.95	7523.19	6580.32	18430.5	165353	9569.07	8901.44	1241.01	539.305	52335.4	2708.58	1598.88	922.509	14137.2	9168.45	4048.72	10633.2	4899.1	19503.5	6701.52	7276.38	11843.8	17535.2	71575.8	12998.9	13205.8	11389.8	44463.2	9166.07	7866.49	5929.25	8658.73	11719.8
good	514775	t12	643	1	2	5490.55	9826.25	6554.16	21951.2	7539.49	3815.65	17971.7	8216.99	24964.1	19097.9	14190.8	2218.21	5743.02	7145.12	11901.7	116016	7176.06	9160.48	2108.27	972.53	8993.7	5992.63	2176.84	3121.61	14854.4	11827.5	6507.3	20037.6	8802.85	15319.6	13773	13225.5	4999.21	26818.9	65768.7	16574.3	22061.4	11438.7	46732.7	12089.1	8745.54	12393.9	8519.34	13204.8
good	514775	t18	959	1	2	4655.91	12043.5	7012.75	21555.3	8226.8	4324.1	17986	7447.14	25813	19929.6	12717.9	2565.04	4525.55	8232.13	8825.01	106682	5841.02	12258.5	1272.18	741.765	11129.2	6670.17	2501.8	2182.44	16470.3	15032	7047.13	10435.9	5195.51	22458.2	16288.4	18940.2	5515.55	21979	95219.9	11940.4	17724.6	13957.1	106452	8455.54	10228	13074.4	9684.01	13517.3
good	514775	t24	1230	1	2	4710.11	12172.2	9815.43	30960	10589.9	5366.74	31038.6	10279.9	39817.2	30487.1	11538.9	3663.83	7232.03	11920	12677.9	148211	13386.1	16827.8	1850.81	504.485	21647	7182.29	2933.66	2587.67	18660.5	24240.6	11732.6	13264.3	12585	18520.9	16199.4	21998.8	7061.69	18567.9	128946	23258.7	31684.5	22282.1	138527	9566.47	14857.4	14628.7	9557.92	19150.3
good	982136	t0	1436	1	3	2070.16	6095.8	1600.39	21597.3	9080.95	2046.95	12893.2	8061.88	14136.9	20260.2	9559.41	2625.09	6854.03	3756.54	19546.5	187262	4582.63	6288.29	789.484	522.076	7195.6	1691.09	1790.2	6642.09	3622.32	3643.03	4385.93	14408.6	5842	16028.2	974.274	16723.4	7502.64	19937.6	37642.2	11705.3	7950.85	8934.75	8592.32	9046.12	3439.23	8374.2	5291.26	4756.44
good	982136	t3	1580	1	3	7378.32	13250.3	4635.84	22942.9	7144.45	5494.46	22932.5	14168.7	26366.8	19658.6	10546.9	3547.73	6536.45	7668.71	15144.1	189697	7929.11	11346.7	1599.53	717.098	5272.88	3986.98	2745.31	4989.41	8785.01	7517.26	4717.32	23334.1	12624.6	14507.2	7438.37	26080.7	5162.59	39890.5	62317.6	18992.5	19440.4	12087.3	33108.6	15433.9	6630.21	20216.8	6035.67	13208.6
good	982136	t6	1724	1	2	5623.68	15658.3	1207.42	24915.6	10384.6	5900.15	25669.7	13473.4	27669.4	22290.2	11816.8	3707.03	8517.8	9267.69	23080.3	229929	7582.52	9993.18	1142.38	699.782	22094.2	3532.73	2800.5	6590.66	11476.6	7068.96	4860.77	18518.1	5578.65	13664.1	2297.42	25687.9	5538.77	17152.7	62256.6	25631.9	8320.91	15891.4	25741.7	11543.6	6358.23	13990.5	7154.95	10590
good	982136	t9	1911	1	3	2887.91	12364.8	706.703	17946.4	8999.03	4553.28	28558.3	13424.9	26085.2	18459.8	10362.7	3532.45	10986.8	8537.11	25726	365946	9450.5	6380.98	870.406	586.058	32553.3	2393.8	2372.46	3915.26	6841.05	3849.04	4074.32	20030	2184.96	12958.1	1188.49	15061	7706.59	17902.9	41238.3	5080.57	4098.19	11089.9	11124.9	10558.2	5523.27	7551.8	5115.27	8171.85
good	982136	t12	2190	1	1.5	3420.73	4478.04	965.029	10263.5	3814.99	4192.05	19398	13333.3	19707.3	10884.8	5391.44	1828.82	5124.12	9466.23	23609.6	166550	4903.77	4869.04	919.688	496.699	11435.4	5382.35	2829.49	4575.17	5104.67	3183.85	4749.87	17512.9	3434.85	8125.57	1693.42	14807.8	3072.4	4516.79	40541.6	13009.7	8348.59	8239.59	10975.6	9725.97	3819.79	9957.66	5307.13	5844.54
good	982136	t18	2688	1	2	2305.86	3477.69	695.841	8788.57	3429.5	2394.59	12333.1	7534.02	9738.11	9081.04	5170.67	1454.1	3297.09	4542.1	14448	112504	3400.08	3290.01	1029.76	498.558	7766.59	3012.64	2894.53	5335.02	1652.2	2751.24	3045.71	16999.4	3106.61	7474.03	1267.88	9395.16	2766.48	5015.89	20164.7	11384.1	4909.87	5803.13		6066.54	1631.88	10968.2	3101.19	4364.67
good	982136	t24	3055	1	2	4007	5385.95	3802.39	23138.4	5702.34	3698.11	9177.02	10613.2	30584.9	12089.2	6807.48	2741.78	6373.53	7890.58	21299.5	97200.3	7406.45	13797.6	1486.8	712.032	14207.7	8508.87	3684.28	13114.3	5305.07	6292.09	8924.75	12051.3	7093.71	22509.5	2694.45	22596	4296.99	24880.2	88821.7	12391.6	5912.2	13356.6	17853.2	8112.31	2839.59	22269.9	10326	6257.79
good	1188036	t0	966	1	3.5	3206.01	5131.49	6791.64	25733.6	6641.49	4164.23	48589.9	9433.25	19530.7	12637.3	8106.96	3029.29	5864.94	10648.3	23510.6	203798	5813.98	7518.4	1700.63	944.316	61923.9	5407.14	3647.73	7674.06	4070.62	5962.03	7276.84	14660.2	5426.62	9246.06	2685.09	25665.1	6190.35	7157.71	58562.8	12799.2	5137.85	9424.94	11698.1	6961.04	3012.99	19606.3	7339.22	4848.63
good	1188036	t3	1135	1	3.5	4037.41	4161.86	6746.51	24513.1	8800.57	4790.25	34129.2	8507.53	15207.7	13190.9	9627.49	3060.29	6230.83	9180.89	30348.4	215689	5875.36	8505.6	2087.63	801.353	32866.5	4088.17	3113.11	5777.36	4343.15	6761.19	6963.68	19154.1	4268.1	4741.88	2865.4	19910.1	6510.97	11430.2	56830.7	18245.9	9917.31	13674	15885.6	10801.1	5413.57	16520.2	9697.21	8598.97
good	1188036	t6	1194	1	3	7669	12327.4	4238.79	51921.7	15994.2	8652.81	74672	19248.1	47004.6	29810.5	15399.6	6013.9	12278.1	20597.7	57251.8	595908	12745.6	18282.8	2962.25	1161.76	37860.1	7324.11	4195.84	9560.46	9246.8	10942.8	9109.01	40576.3	7276.69	5805.35	4515.05	37587.5	13839.3	18075.2	137657	27265.1	18174.5	16740.6	24906.1	21863.9	7664.59	45698.4	12835.7	13871.2
good	1188036	t9	1345	1	3	5520.92	6145.43	4115.18	33706.5	9111.95	7376.98	78810.8	24006.2	31918	17747.2	8565.01	2317.66	7793.93	24721.7	28513.6	315406	6763.22	9913.05	1522.63	469.719	106002	7273.74	3625.45	8014.71	11811	10250.8	8685.59	17638.4	3696.45	5154.72	3711.22	32805.8	6392.48	17184.1	69514.8	15652.9	6838	12058.3	23373.2	8369.42	4986.3	25250.4	7805.98	9507.19
good	1188036	t12	1517	1	2.5	5826.81	6629.82	3160.07	32043.8	8963.48	7703.95	41562.8	24517.1	45144	19035	12153.8	5215.04	11111.2	27156.7	52532.9	461243	6950.79	9094.21	2048.82	789.614	57674.5	8175.67	4414.32	5727.5	6478.87	5669.66	8486.06	26876.2	3045.55	2008.39	2694.87	26866.3	6781.05	9543.19	56817.8	11745.9	6710.73	11057.3	28659.1	11688.7	4156.25	20904	6337.52	9907.41
good	1188036	t18	1877	1	2.5	5391.26	11458.1	2145.99	24459.4	9705.75	7648.32	75428.4	21920.2	37291.9	19763	12153.8	4297.58	7840.79	16743.2	49922.5	476581	8521.51	11808.7	2252.48	761.162	40908.7	3105.86	1232.29	3049.13	8509.69	9609.4	8303.43	36874.5	3633	1387.64	1289.14	11934.6	6252.22	22768.3	83597.6	27355.4	18444.5	17908	31434.3	12862	5719.45	28736.1	13284.7	11008.3
good	1188036	t24	2460	1	2.5	1676.8	4557.39	4456.55	14560.9	4440.93	1590.6	80612.4	9468	28067.8	9547.09	8738.39	1787.66	4435.87	3975.69	14262.4	164187	5991.13	14493.2	2310.36	905.299	5017.33	4197.94	1791.04	3727.73	2403.29	2460.74	6824.42	14219.9	2257.31	8135.76	1792.38	13392.9	7872.52	14443	35106.9	8716.01	11809.9	7411.16	11533.5	4718.06	5120.48	12352.6	2706.52	3026.94
good	468837	t0	1334	1	2	2815.63	4107.34	1486.9	8851.44	3204.76	2937.52	33928.6	6411.26	10548	6981.47	3507.58	1733.96	2556.9	5668.82	6347.71	201240	3122.32	5490.4	1240.6	338.131	6333.91	2926.55	2017.59	3179.15	1836.11	3063.75	4571.57	16497.1	3845.06	5062.84	1023.51	7941.94	2418.61	10172.7	48454.4	14036.2	10509.1	9023.51	18769.5	5616.43	4014.93	8604.09	4509.91	5619.38
good	468837	t3	1484	1	1.5	6454.44	10238.1	9218.58	19306.3	5916.27	8671.22	19039.7	15319.9	60656.8	25362.5	8135.17	5469.95	5583.23	94283.6	22215.5	220763	12865.2	26053.4	888.344	179.674	21174.1	3617.35	1595.48	2249.08	47429.7	65907.1	17876.5	10061.4	5417.59	5181.76	24769.3	3223.76	4523.78	31082.1		18689.9	36789.3	33032.5	161137	10841.1	23498.4	23339.8	12778.7	29520.8
good	468837	t6	1603	1	2	4158.53	6048.17	3711.22	13142.2	6769.85	5013.92	36236.7	9780.9	26625.9	14303.5	6774.7	3760.39	5417.34	11569.5	19495.4	198221	6634.29	13666.6	1032.6	295.453	52951.3	3302.99	1990.45	3538.31	3828.81	7081.23	7807.95	19598	3871.26	8209.13	2996.72	12437.5	4691.07	24648.3	83061.3	18793.6	11539.2	13756.4	65162.2	11827.3	5750.96	16301.7	7389.74	11613.2
good	468837	t9	1765	1	2	6477.46	10473.6	4710.15	19254.4	8816.03	7493.37	53315.8	16511.3	45409.3	19041.3	7703.65	4218.47	7143.51	27529.8	23685.7	371564	9918.31	14227.9	1704.93	445.029	61627.8	6546.87	3604.51	3422.55	18479	17941.8	10607.2	25321	5421.21	13281.8	17697	16629.2	4481.76	29450.8	123527	21227.3	18655.7	18951.6	85606.2	12053.5	10033.7	15472.5	10294.3	15185.6
good	468837	t12	1912	1	2	7492.57	8452.47	2229.46	17835.3	8223.96	7821.95	44191.9	25427.7	44354.4	12974.9	5378.57	2477.9	7280.31	29305.4	29893.4	365368	9505.14	10861.2	1454.25	403.911	51075.4	7693.36	2445.68	4255.09	10563.3	9608.41	7891.51	23772.1	3960.82	12284.1	10817.1	17712.3	3191.44	28754.2	84451.2	16808.1	11172.7	12573.9	63317	13190.8	6700.53	15218.6	6384.64	11513.7
good	468837	t18	2410	1	1	6746.26	8248.9	390.094	13756.7	7663.45	8739.31	80345.8	27087.2	41034	16435.3	6923.85	4040.47	9822	21496.1	38129.3	754473	7457.25	7580.28	1569.22	386.603	17339	6240.72	3990.7	2928.55	4642.04	4504.21	3963.89	32395.6	1960.92	9047.18	2768.82	13244.8	4174.64	17086.2	55165.7	13060.7	18934	16040.3	12922.7	7899.24	4617.5	10860.9	4724.12	10168.8
good	468837	t24	2771	1	2	6054.62	9190.93	21999	13857.8	4922.47	8552.93	42880.2	18649.2	136542	17672	7728.52	2826.91	7066.8	59711.5	17958.5	119110	13085.6	27118.9	1363.45	266.994	20948.5	1942.37	681.499	2059.89	58537	24193.1	7964.76	6196.61	3288.88	4879.57	8901.03	6182.02	6274	9659.78	151243	8895.13	11187.1	22884.8	109427	6993.63	10655.4	16984.5	7045.41	16268.2
good	1245540	t0	1241	1	2	5764.28	9440.66	4807.71	32381.7	9964.82	4507.28	37631.6	14019.9	29809.6	20469.5	9273.45	3433.21	8106.19	10838.4	30189.6	215928	8196.37	15309.7	3190	898.52	32778.7	5946.63	3980.22	12820.9	4306.78	7670.18	11055.7	25461	7615.23	27951.3	3137.79	17120.5	7704.01	11852.5	62232	19075.3	8436.58	12854.7	18504.1	10097.9	5023.2	22606.7	8199.89	7671.25
good	1245540	t3	1395	1	1.5	5707.63	7245.43	6100.58	25813	6911.42	3841.08	15478.8	9912	24147.1	21463.5	9247.39	4054.06	5243.71	17365.2	21861.5	243948	7707.09	18901.7	2706.76	556.124	41808.6	5832.28	3861.76	7981.31	18679.2	24601.2	12401.8	26178.4	8468.78	16197.2	32065.9	16793.6	7190.29	9720.79	95799.7	21054	11427.8	12189.2	60084.5	8347.96	8321.61	32605.1	10866.1	15221
good	1245540	t6	1553	1	2	5407.29	7553.79	3735.95	36981.5	7198.68	4432.51	25001	10334.3	22136.6	15016	9027.03	3562.26	5672.29	10406	22101.6	232902	9073.33	17269.9	1904.76	513.825	87170.6	4676.64	2788.36	7471.9	2781.15	6986.63	10010.9	16126.2	6759.75	14370.8	3384.31	22233.1	5007.05	9641.15	69997.4	25978.1	10862.3	13379.6	24151.5	11103.3	6168.28	26828.9	8789.59	11371.3
good	1245540	t9	1709	1	1.5	5760.2	7376.44	5709.65	38698.6	11617.1	4374.66	30805.6	10576.4	26527.2	25486.1	11336.1	3843.78	7093.71	11131.4	33313.1	367939	8391.62	17790.1	1885.71	553.493	46077	3857.06	2936.03	6885.36	10218.8	14545.8	11528.6	25034.3	6479.71	7337.63	8264.9	21084.9	4922.5	8962.16	124724	29249.5	15187.6	13517.9	64028.7	14720.8	7309.15	36272.2	12762.4	14862
good	1245540	t12	1868	1	1.5	5799.32	8115.56	6682.61	35176.4	13148.3	4490.08	38535.4	13989.2	28046	26436.8	13972	3303.16	8100.8	15879.7	38763.5	402120	8962.2	13955.9	2480.82	531.819	14180.9	3615.43	3074.67	5252.54	13929.8	14681.6	10228.7	29765.6	6041.94	9737.21	15232.3	18644.7	6146.94	5640.39	42601.2	11393.1	7873.27	12516.7	32401.8	9132.04	8813.48	9327.27	34820.1	9593.93
good	1245540	t18	2421	1	1.5	5895.51	8398.8	4669.16	41553.2	13862.1	5249.15	29047.7	15955.4	31306.2	26638.2	14786.7	2641.43	9939.79	12818.7	53095.2	379888	7023.54	12208.4	2874.66	780.484	12224.4	5033.99	3903	8121.47	4195.27	6200.07	8261.4	26507.1	4593.63	15529	3195.41	14027.2	7858.41	16350.8	52192	19657.9	10421.3	10302.4	17760.1	14772.3	5387.9	19779.3	6803.42	7821.2
good	1245540	t24	2774	1	1.5	8008.03	9015.83	3070.28	38225.5	12971.5	15283.3	37980.8	23245.5	38828.9	25299.3	16182.4	4304.78	11431.3	17481.2	56448.2	429393	11839.6	10869.9	2632.15	702.94	22528.7	7700.18	4955.14	10012	6645.69	7249.59	10193.6	33126.7	2971.23	15874.5	5362.84	22963.6	8427.46	15370.8	81676.5	13996.1	8142.71	14051.6	21513.3	12945.9	5424.63	15022.2	7768.95	6915.9
good	995640	t0	1549	1	2	6495.28	11586.6	3311.84	24711.3	8874.92	6696.52	40479.6	17404.9	39010.5	20670.1	12405.9	4901.96	8926.52	15203.3	34914.6	451272	12688.6	20313.8	1749.51	670.621	94763.2	3225.46	2477	6877.16	13790.2	10375.2	10891	24864.5	6503.66	9321.25	2962.39	15920.7	4914.87	24214.3	95616.6	24294.5	15138	18883.9	24283.4	11386.1	4617.74	13279.9	13891	10267.5
good	995640	t3	1707	1	2	3931.42	7206.35	13267.7	18800.1	5732.4	2081.91	257260	7933.57	29907.7	11412.8	7590.8	3372.27	4899.45	5815.48	17400.5	145670	8566.85	18640.6	2452.9	1289.73	134031	4049.3	4424.6	13383.3	4759.09	6680.63	10777.9	20109.4	8580.2	47613	4878.58	16142.5	6085.84	19711.5	39297.9	9800.64	8336.29	10018.5	11881.7	8235.93	3416.21	11342.5	6657.97	6947.33
good	995640	t6	1864	1	2.5	5179.53	10263.5	1991.7	20939.3	6869.21	3799.69	11733.7	8888.7	17365.2	13316.6	9919.35	2633.1	4669.73	6177.08	17289.7	195294	6679.78	12653.6	2931.63	670.777	69052.7	5257.75	4098.59	11485.7	6694.94	9547.85	11487.8	26290.3	8069.57	16708.9	9020.56	27782.5	5424.72	28792.8	70101.8	17383	10134.9	13777.6	34936	12673.1	5726.67	12174.2	9901.12	11106.3
good	995640	t9	2059	1	2	5664.89	11923.8	2949.44	29779.6	8962.3	4886.89	16113.7	12492.2	26548.7	17573.4	12087.1	3653.14	6265.78	8441.14	18500.3	349318	8127.82	14367.3	2876.37	942.853	23386.4	4754.26	4101.13	10867.2	5879.98	9699.21	14730.6	27249.9	12470	11568.2	7976.94	43215.7	3934.91	34006.8	73206	25114	20827.1	17324.4	23931	18578.4	6513.64	9586.53	13536.3	13796.7
good	995640	t12	2372	1	2	3402.54	7039.22	8176.18	17494.2	6327.31	2316.65	9286.1	11268.5	35567.1	15280.5	12265.4	2756.42	5666.15	5795.84	16046.7	176589	9733.26	30398.2	1954.44	541.173	4089.11	3627.1	1488.82	6763.6	4083.6	4163.77	9125.38	14763.5	5757.64	10299.4	3824.9	29703.7	5426.38	24503.2	73314.5	9390.5	12402.8	11721.5	23865.3	9004.22	4063.18	10768	8220.76	6583.49
good	995640	t18	2752	1	1.5	4511.07	12317.5	37623	20795.8	8191.22	4162.65	38474.3	17884.6	65853.3	19726.3	16072.2	3392.47	8337.5	14040.9	25313.6	230507	17427.8	29297.7	1993.17	564.81	22789.1	4638.82	2063.43	5502.67	12814.7	10298.1	11719.6	15439	6488.2	23509.1	16193.5	23493.9	7331.11	41967.3	106648	13955.4	18958.2	15850.9	50197.1	9233.46	9268.34	15265.7	9555.59	8751.23
good	995640	t24	3158	1	2	7201.78	11523.1	3734.42	23998.6	7949.94	9284.73	32711.5	25599.8	40598.9	17436.6	12750.2	4495.12	9475.43	17715.6	32334.5	422664	11729.8	13642.2	1936.56	572.609	10008.7	5745.37	4443.73	8978.83	15431.2	8179.93	10415.4	31003	6652.17	9956.71	8659.4	40438.1	5129.6	21963.7	73573.5	26351.8	23298.4	19546.8	26453.1	11832.1	6767.52	20108.4	9933.07	16078.9
good	1274416	t0	1563	1	4	7482.15	10142	547.427	23658.6	11813.4	11083.4	76441.3	29733.3	44591.6	16720.2	25030.8	5570.23	15305.4	30479.4	76055.1	851320	9462.05	9528.06	2065.8	990.199	90726.5	5120.02	4712.71	6729.08	11323.6	7437.24	11124	52543.9	3876.4	2756.43	2029.52	24475.3	6224.94	22880	75999.9	26270.4	15762.2	19043.1	11955.7	10324.5	9528.12	25009.5	12890.6	8848.31
good	1274416	t3	1722	1	3.5	8600.01	14988.9	2591.31	23843	11804.1	9268.18	40623.7	16042.8	38770.5	14991.8	19931.6	3438.67	9106.6	25897.1	36324.8	534886	19783.2	14080.5	1600.85	538.222	9588.01	2380.8	2093.56	3104.92	24998.5	15921.2	7554.55	22840.5	3599.17	953.528	10236.9	14165.1	3969.02	17852	115352	26071.3	19188.5	13474.3	65490.4	12070.2	11226.8	27151.6	11024.2	14578.2
good	1274416	t6	1871	1	3.5	8189.51	11259.9	4244.09	25897.4	9202.34	7076.18	20558.6	12086.9	39926.4	16868.4	13832.8	4177.51	7067.9	17199.8	22559.3	201018	8516.27	20085.8	3138.82	987.017	29050.8	5358.46	3219.39	6114.29	15279.1	18231.2	11310	22491.5	10853.2	2827.59	18216.1	19745.2	4817.68	15119.6	112250	16698.5	14411.5	16493.3	64512.5	11702.5	11577.6	27689.3	11426.5	13798.1
good	1274416	t9	2093	1	3.5	4844.31	10629.4	5804.15	28029.6	9771.23	3360.65	24832.9	5980.69	24258.6	13915.3	17481.2	4284.18	5995.26	15438.2	21570.1	182313	8956.06	22887.3	1783.31	1031.47	10208.6	4493.08	2697.31	7762.9	17610.4	14758.6	8885.76	13280.2	4436.17	5889.12	19739	21021.8	9039.42	17798.6	128302	17315.1	14067.7	13655.8	67891.8	9463.37	8823.58	22046	9670.9	12007.1
good	1274416	t12	2393	1	3.5	4274.66	7355.12	339.092	40531.2	11811.9	4510.58	63023.1	8910.44	35361.3	17620.8	22092.5	4707.7	8016.86	17340.1	15729.7	251771	16955.4	26970	1905.37	568.244	25811	3748.05	2621.51	7921.43	12992.9	13655.9	12258.2	20609.2	9206.49	7232.55	14151.8	28706.4	8422.58	14471.7	79030.6	19983.5	13885.2	14278.6	41940.6	13185.8	10523.7	20286	8533.17	11463.5
good	1274416	t18	2750	1	4	4684.35	8859.22	7085.98	35883.7	12150	6151.33	27131.9	9988.83	34018.3	21637.9	20230.9	5341.8	8376.18	22817.4	21063.7	301324	9913.24	21921.1	1940.76	506.363	7985.36	2376.19	2997.09	7628.55	16337.5	16014.2	10215.2	18904.7	7615.23	3587.48	16239.8	24356.9	5731.89	16642.4	69360.2	22938.5	21644.1	18373.6	59150.5	13283.2	10389	29570.8	8713.74	13281.5
good	1274416	t24	3095	1	4	6615.16	14430.3	6833.39	35876.9	13097	6657.55	117611	10765	39772.3	23041	26069.1	5007.71	10245.9	26296.3	38942.2	336309	9462.05	23218.5	2584.42	718.803	13555	7507.06	3462.52	10349.5	20532.4	18797.2	9594.1	20594.4	9407.51	14260	21943	26202.9	11919.1	19948	140189	22906.5	27644.5	22155.4	80068.1	13092.8	12669.8	25725.3	8484.48	11401.1
good	934850	t0	1314	1	2.5	3794.87	7773.3	2237.02	19927.7	6711.78	4611.93	193627	7012.7	27191.3	11787.4	12648.7	3710.65	7160.74	9262.62	25825.4	232072	4168.31	12558.3	1176.41	586.639	75972.2	3058.9	3273.01	7849.52	4090.16	4767.65	4332.73	10006.4	3778.34	10039.3	1821.13	11888.6	5023.8	12581.1	39566.1	16259.1	8461.35	12779.1	17360.6	10398	2465.24	31026.8	4230.21	9319.45
good	934850	t3	1454	1	1	2548.21	5803.98	3246.24	10778.2	3914	3859.64	31619.6	11808.4	20055.8	11460.9	10169.7	4102.93	5667.81	14745.2	17850	177438	3489.9	7190.69	582.822	204.598	8036.55	2479.98	1706.11	2091.49	12740	4540.63	2549.6	9555.13	1789.65	596.973	6305.69	6150.74	3115.9	11748.2	61585.2	8449.5	8890.22	7087.27	72862.2	8749.44	2676.24	30771.3	3078.15	12099.3
good	934850	t6	1589	2	1.5	3418.18	2983.79	4930	15813.6	4096.18	6158.51	26516.6	15123.6	39046.7	15449.3	7798.97	2076.35	7184.22	2076.35	13673.4	107982	4005.23	4005.13	1216.78	462.11	10907.3	7403.29	3267.36	2871.79	22213.8	14259.7	5517.8	26047.2	4407.13	5987.33	12139	13856	3188.64	9857.91	54545.7	8367.51	15565.2	12017.3	38124.8	4926.72	4853.19	15298.4	5854.49	12224.1
good	934850	t9	1747	2	1	5487.43	7693.33	1928.23	29475.7	8343.63	6766.18	42648.4	14055.6	28852.9	20922.7	16775.1	3228.78	12078.3	3228.78	23552.1	236591	6418.18	6316.75	2768.71	1119.36	68843	10164.3	5691.03	7213.23	8760.39	7294.76	8637.52	38751.9	5122.91	4920.19	5115.02	17349.6	4922.36	18057.9	69381.7	18631	16897.9	15221.4	24713.4	11329.6	5082.5	29370.5	9755.76	14835.8
good	934850	t12	1936	2	1.5	4322.29	6362.88	3739.39	20107.1	5707.33	4563.68	25538.6	10813	21726	18833.6	10747.1	2210.93	6772.39	2210.93	14964.7	150601	6051.67	5644.63	2225.36	676.581	42135.9	7837.5	4608.49	5829.77	15468.6	12054.1	7374.4	25563.5	5791.43	5462.51	13800.9	15038.9	4063.37	14707.8	40191.2	19970.7	21214.4	12744.2	43964.3	7903.82	6222.95	24595.3	10687.6	14275.1
good	934850	t18	2490	2	1.5	1994.69	4043.43	8445.27	18951.3	5482.33	3380.05	20396.5	6184.18	22773.8	13066.3	9532.46	1833.82	6372.86	1833.82	11312.3	79724.1	4633.83	6919.24	1346.88	473.954	10810.1	4661.02	2961.41	3990.29	13714.4	9702.43	6761.94	12815.4	5236.18	7220.41	13035.5	13667.2	7312.33	16615.8	42137.6	7511.19	11268	12545.2	49166.7	6387.29	5907.08	6967.17	4223.82	8798.06
good	934850	t24	2886	2	1.5	4441.98	4723.71	20666.6	26693.3	8251.88	5834.62	85615.6	9130.81	27740.3	23580.2	16160	3186.36	10479.4	3186.36	19531	127505	6713.21	10894.1	1844.16	764.24	49429.1	7794.12	3669.12	5716.48	18446.2	19359.5	9345.63	15700.5	7271.71	15680.5	23034.2	24285.2	9354.25	27830.5	90369.9	15072.3	14444.7	22205.2	103692	9664.1	10633.9	13962	8372.46	14811.6
good	939593	t0	1499	2	3	5507.65	7517.17	2375.74	34475.7	8835.19	6572.9	19867	16741.7	31840.8	23452.8	11206.8	4022.48	11915.4	4022.48	27419	257304	9123.59	9750.8	1844.33	892.824	5752.32	5452.23	4129.77	8489.74	8244.21	8432.56	9499.2	38890.8	5317.9	26611.9	3476.61	19950.3	8033.09	17992.4	53992	27003.3	19501.7	13257.8	27872.6	10783.7	8251.35	16368	8843.88	13604.5
good	939593	t3	1663	2	3	6443.99	5769.2	1161.81	32809.2	9996.02	8128.19	28413.7	20103.1	32201.8	25412.4	11140.6	3532.17	13217.9	3532.17	25989.6	273648	8376.6	8902.43	1903.51	782.615	39659.3	6839.08	3930.37	8894.42	8516.47	8181.9	8376.92	38624.2	4958.43	32518.1	4156.05	20651.2	6481.38	15529.1	56154.1	20687.8	16714.1	13252.4	22456.4	9955.69	6904.16	18464.7	7352.98	10008.9
good	939593	t6	1755	2	3.5	4614.55	5231.67	1418.27	26950.2	7934.73	5451.93	37381.1	17189.8	31082.4	23116.4	12204.8	3544.28	13712.5	3544.28	30398.1	313396	5528.11	6509.61	1737.38	848.665	42719.6	6882.47	3403	6387.9	5935.82	5386	6991.91	31581.2	2708.73	33817.2	2992.49	13493.1	4812	10041.9	58017.2	10632.5	7264.86	10254.3	18069.5	6768.68	3875.48	17202.7	6373.66	7719.86
good	939593	t9	1933	2	2.5	4614.55	3953.78	792.583	36699.6	4935.58	3646.85	28940.1	10676.4	39967.7	16787.2	5606.09	2710.89	7636.98	2710.89	20640.6	142732	6132.79	6715.54	1468.22	695.737	4564.29	1932.05	1190.15	3025.89	4899.29	4794.11	4098.73	17492	4108.67	9287.35	1454.12	5051.07	4139.23	13569.6	48047.6	10766.1	8793.05	6738.75	15311.2	7314.34	3873.29	28841	8680.85	8132.28
good	939593	t12	2195	2	3.5	2346	2913.41	4074.66	17965.7	3428.16	1325.29	80354.5	7504.73	19109.5	7942.45	6892.47	2597.67	5964.77	2597.67	11237.3	58688.7	4104.88	16145.7	1567.29	864.817	22275.8	2143.33	3012.15	7840.1	2456.54	2820.82	5104.67	16830.9	3940.92	66282.7	2970.04	6062.86	10675.7	9218.35	33090.8	8788.48	9986.56	6225.11	13125.1		3137.58	47433	3787.35	6279.1
good	939593	t18	2656	2	3	3015.33	4939.51	2060.03	22423.7	5430.11	2835.16	16406.7	6876.87	13843.9	12695.4	7614.91	1998.4	5645.26	1998.4	12832.5	129591	3638.19	5851.32	1485.55	637.79	7760.6	3964.78	3015.47	6704.51	3792.31	5497.79	7111.5	17316.6	6826.37	34190.3	3154.03	10016.1	6094.55	11600.3	46877.7	13296.5	9152.48	11216.5	15524.3	8632.25	4608.21	26893.8	5723.46	8417.98
good	939593	t24	3027	2	2.5	1616.18	2831.32	3594.63	22205.9	3705.56	1528.45	36897	5265.81	16501.5	13391.7	6388.67	1644.37	5876.68	1644.37	12707	88237.5	3837.35	8495.18	509.081	309.525	5490.39	1400.83	534.796	2308.61	2294.26	2514.77	4995.09	6050.63	2038.82	20818.1	884.317	2641.81	13557.8	10316.8	29162.9	9626.98	9983.73	7752.66	9944.12	4266.27	3379.57	25032.9	3260.6	4258.44
good	1135806	t0	513	2	2.5	4242.9	6130.54	3188.33	22600.5	10481.7	4329.68	39814.5	9792.76	21214.3	22611.3	17532	3715.9	11066.7	3715.9	27353.8	157911	7054.94	10939.4	1958.12	677.591	4837.33	3101.84	3497.71	7916.76	7358.4	8288.27	11866.2	17758.3	6118.74	12800.4	3573.29	13062.9	12227.8	14911.3	47862.9	23559.2	15171.6	16041.8	17220.1	10624.9	6489.29	32499.1	8286.39	11607.5
good	1135806	t3	712	2	1.5	8434.67	12021.6	13257.2	28680.9	11909.9	10169.4	44919.3	33664.1	79947.4	36479.8	23861.5	7245.4	15203.6	7245.4	32988.9	309273	13298.9	22391.9	3629.05	942.606	93114.7	11415.4	6097.76	9604.48	22710.4	39046.7	17486.6	34292.5	12112.4	10978.3	25071.3	32221.9	15147.8	25225.1	114922	28873.5	35227.5	22028.9	86896.4	11378.9	15167.4	65573	11339.9	28547.6
good	1135806	t6	901	2	1.5	5787.88	7244.12	2475.35	22019.1	10098.3	7707.32	34978.5	26884	44377.6	17475.7	22220.7	5450.7	12444.7	5450.7	31126	228528	7220.24	10522.4	2353.59	758.05	58027.3	8573.36	4655.44	10608.8	9476.7	9462.19	9126.78	29921.9	5524.58	10629	6654.19	22954.2	17654.1	14660.1	86363.3	14037.6	21342.5	14651.2	35720.7	10879.3	6051.54	22367.4	9234.74	13946.3
good	1135806	t9	1017	2	1	4866.49	3685.92	19381.3	11990.3	6226.57	4231.87	162013	19897.7	48671.8	12271.7	8761.66	3778.14	10571.1	3778.14	20798.7	115406	5633.81	8581.73	2207.88	398.514	26005.3	7436.7	4353.55	5697.81	22435.6	11313.7	7396.74	11752.9	2032.7	7193.25	16344	10817.3	13982.7	7854.67	70613.6	6864.31	12463.6	12201	18796.3	4192.69	6433.02	7609.12	5964.43	8791.41
good	1135806	t12	1152	2	1	8159.17	9172.93	5583.89	26011.7	11057.2	7697.09	52978.8	24296.6	69127.6	31570.6	21308	4350.85	14407.8	4350.85	35647.4	273218	9135.4	13691.8	2674.74	648.169	16186.6	2659.73	1275.1	1906.7	28266.3	7980.32	6738.16	22279.8	2791.12	2012.55	2009.7	5157.15	10243.3	26544.5	73724.2	22546.7	24379.1	21220.2	38500.1	11100.5	8720.18	15585.9	11930	17104.5
good	1135806	t18	1507	2	1.5	6166.7	9805.8	7135.56	26074.1	7912.96	7557.75	26033.9	24976.7	52556.7	26793.1	13873.9	3702.6	7807.99	3702.6	12846.3	148839	9456.16	12667.3	2564.5	675.985	46842.1	11107.4	4373.64	7804.16	22859.6	21652.5	13284.8	21535.4	11966	5921.63	22149	25173.2	10829.8	15399.9	99430.6	18808.3	28009.8	18680.9	97322.3	12090.7	10213.7	23143.9	7743.37	16233.6
good	1135806	t24	1876	2	1	6274.65	10848.5	3587.34	30960.9	8850.76	5768.37	17107	17768.5	37214.1	26856.4	20007.2	4540.63	8552.16	4540.63	14121.4	149090	7370.14	15747.9	4732.38	1045.94	43536.9	10901.4	5291.77	10941.1	28586	29923	20103.5	28361.8	11584	11985.1	21040.1	22445.1	11652.7	21950.5	163932	28375.6	33493.2	24626.1	105384	12495.1	20078.5	44953.7	11870.7	23587.2
good	491365	t0	1092	2	3	3426.84	4872.02	1921.56	22562.5	7353.97	3381.37	17276.9	7781.4	16317.9	25088.9	13101.6	3455.63	7759.78	3455.63	15304.5	153182	7246.62	8827.4	1967.9	926.912	37412	4777.77	3780.53	8748.4	4304.15	6490.66	8728.76	22810.5	11307	10116.5	2238.63	15610	6777.52	12995.8	70046.7	20028.1	14135.4	11364.8	28830.4	13510.4	6432.57	34101.6	9340.6	13067.8
good	491365	t3	1214	2	1.5	5137.41	8382.35	11226.9	29369.2	8011.93	7597.3	18739.3	15813.2	51523.1	40641.9	13674	5790.71	9829.81	5790.71	12483.1	144618	11029	17846.1	1585.86	619.011	47181.6	7439.22	3560.14	5531.91	33806.1	44745.6	17616.3	20929.9	14275.3	10359	33424.8	24984.6	8444.56	16983.9	134358	17713.1	29107.1	30917.6	109580	13370.1	10959.5	26387.7	11168	26091.4
good	491365	t6	1308	2	2	5264.44	6275.38	29882.3	27838.2	9118.51	6496.43	69020.8	15811.4	35153.2	28348.5	12832.9	5878.48	8743.07	2939.24	19786.7	209461	8193.86	12455.9	1676.32	539.239	128219	4191.65	3802.7	7788.12	9567.52	15600.8	10596.8	19299.6	7442.85	7757.85	9258.48	19663.8	5890.67	6888.84	86005.5	15172.5	18182	13048.8	30643.7	9767.66	4654.79	27467.4	9856.23	11449.9
good	491365	t12	1611	2	1.5	6388.09	7265.26	9941.52	28794.7	9215	7826.66	31285.6	20704.1	59466.9	37218.7	11942.3	4746.3	11950.2	4746.3	16085.3	151335	10768	12571.7	1546.06	887.784	119484	6886.13	5928.24	8106.7	33125.7	29015.2	11231.1	23152.9	7094.06	7863.3	28228.3	18809.2	8090.27	11667.9	82204.5	14386.6	14674.1	14000.5	46473.3	8862.37	9290.56	22574.6	10951.4	13884.8
good	491365	t24	2532	2	2	7587.03	6269.64	11639.8	23604.3	6391.5	9248.6	14226.9	30799.5	76194.2	30572.6	12669.5	5762.23	12940.3	5762.23	12230.7	116623	10172.4	11467.9	1595.56	536.104	59569.6	8067.58	5463.97	5911.86	39774	38669.6	13115.9	19533.3	5552.87	5299.87	55637.4	25738.3	9025.83	16491.2	179429	16050.2	17321.5	27750.7	86353.4	6765.15	12762.4	36783.4	12625.3	22122.5
good	1181860	t0	967	2	3.5	3899.72	5404.6	4295.8	18307	8592.39	4549.39	27845.6	9928.42	25873.2	26806.5	17612.8	3935.77	11451.8	3935.77	26089.2	225441	5932	11050	1759.72	632.446	21156.6	1926.48	1993.54	4638.48	8902.34	6080.43	6594.75	19488.6	4473.83	1136.6	1130.23	9023.44	6534.46	22294.8	39799.1	11558.2	9226.69	12417.2	21563.9	6645.29	6790.25	26515.7	9162.69	7475.57
good	1181860	t3	1133	2	3.5	6064.54	10331.3	8258.02	22569	8330.12	5448.55	82993.5	10022.8	29761.1	42076.2	34399.5	3893.54	10472	3893.54	22155.8	236071	8088.25	17018.4	4639.6	1356.18	98577	14600.7	5950.47	6295.69	14452.8	16951.6	14831.3	41322.8	14622.5	6433.36	26222.7	20097	5012.68	29979.1	84073.9	15977.6	16368	12631.6	34741.1	8662.23	10295	35009.2	9913.25	15046
good	1181860	t6	1196	2	3.5	6771.53	10257.9	16109.4	23410.3	9397.3	4358.77	36501.3	10320.7	28749.8	30067.1	22858.9	3294.58	8300.38	3294.58	14721.5	145584	7071.12	13314.7	5213.89	1822.84	95935.5	6800.92	5799.32	7722.53	19605.8	20621.9	15414.9	23848	2149.13	5676.18	33885.8	26153	5727.86	33830.9	123203	19785	19356.9	21541.9	52922.2	9683.66	14429.9	29417.7	12813.2	20186.5
good	1181860	t9	1342	2	3	9648.82	7289.93	7462.79	24045.3	7890.47	4074.72	98774.2	9211.77	20499.7	24871.3	31482.6	3311.51	7015.59	3311.51	11578.5	181508	6672.15	10495.7	2809.66	889.98	134201	4127.74	4261.44	7736.49	10573.7	12932.2	9195.25	19569.1	12553.1	5611.3	21029.9	24282.9	5129.13	32054.6	54481.2	13390.2	31629.2	13211.4	35598.5	12113.7	8271.84	24764.1	8118.92	15177.4
good	1181860	t12	1480	2	1.5	8077.25	11615.4	11476.6	40017.5	15323.8	8106.65	34250	18699.6	44718.2	44425.8	33401	5437.9	14087.3	5437.9	21931.1	308371	12449	20685.7	3566.39	1258.24	19999	6010.34	5027.13	7966.21	16463	19148.5	15550.9	44770.3	15083.8	4600.45	20312.2	37797.4	3290.44	24333.1	112923	26985.8	26325.1	20319.1	64611.2	21028	12985.2	38513.5	3011.56	23377.9
good	1181860	t24	2381	2	2.5	5810.11	10238.9	28198.5	39093.4	14043.1	6980.37	130118	19591.7	72214.8	32033.1	42608.2	5010.5	18429	5010.5	29423.7	197833	15656.3	26623.7	3638.28	957.691	61080.4	6187.44	4328.01	6704.25	22286.7	17386	16134.3	25584.5	9988.05	13184.2	25344.1	25296.4	7263.16	21591.3	94829.2	14834.9	18780.5	18565.2	79254.9	11067.5	14641.4	21151.4		16833.8
good	1267837	t0	1378	2	2	4955.19	4131.58	1118.16	14313.5	3660.92	7254.57	49991.6	15862.8	33664.4	13753.1	12395.8	4906.95	7838.58	4906.95	10269.5	144547	3489.36	8160.96	856.379	236.943	91224.9	4962.89	2727.66	6314.89	5035.81	7978.53	5813.52	12222.7	5743.43	52003.1	2637.89	19656.2	3027.78	10401.1	44126.3	9826.31	9411.51	11031.1	16913.1	5483.2	3627.87	20510.7		8400.4
good	1267837	t3	1504	2	3	10517.1	9681.87	15211.4	15648.9	9706.94	12851	47621.1	40846.3	88964.3	42718.4	45648.3	6205.01	19663.2	6205.01	26819.2	682344	10835.3	14282.3	2847.74	599.114	74708.7	10832.5	5897.07	4690.8	55062.2	27344.1	13409.5	39493.5	4640.95	45195.8	48358.6	28461.2	23916.5	18196.2	69252.7	22612.4		30299	84427	11942.3	25391.2	32285.1	20151.6	24820.3
good	1267837	t6	1686	2	3
good	1267837	t9	1846	2	2	8735.37	10236.6	7597.92	23351	8672.34	7142.39	23303.7	15517.9	51111.6	34486.3	18746.6	4342.76	8525.2	4342.76	12332.3	169657	9184.45	16966.1	1994.13	373.817	80107	6681.01	3048.74	5241.88	26602.4	19778.4	10793.1	19425.3	8170.25	21398.6	18203.8	27168.5	4699.08	16415.2	145431	21915.1	24433.5	22568	82110.6	11079.2	13676	18473.1	18412.1	20050
good	1267837	t12	2055	2	2.5	6758.78	10489.6	4220.9	28023.5	8883.23	5431.05	15987.3	9627.75	27037.5	23142.6	24584.9	3754.34	9404.68	3754.34	18389.4	257838	8800.08	16607.8	2199.71	455.394	21812.7	4640.75	3517.45	8118.99	23155.4	14128.6	7699.27	20008	4974.94	58010.4	13855.3	25502.7	9711.73	14137.2	95074.8	19586.2	37800.3	15657.2	61325.2	16658.8	12942	24834.6	17598.2	18621.8
good	1267837	t24	2933	2	2.5	5130.63	8811.38	14086.1	30130.2	10147.5	7181.57	36763.8	10838.9	65751.3	35634.7	28943.3	5813.39	12352.2	5813.39	16854.3	170237	18400	30434.5	1568.07	316.059	21012	5581.33	2559.89	6560.39	31906.7	21162.9	17180	11449.1	13166.2	107629	18860.9	43464.7	10503.1	9094.19	127905	10735.7	17448.2	22176.1	74985.5	7691.34	11461	18324	14585.3	14352.4
good	1260153	t0	1409	2	2	2621.8	4439.02	2954.52	26361.3	8368.81	3998.33	19022.1	8101.04	14884.3	23566.6	12715.1	3071.09	7784.84	3071.09	13586.3	173022	6092.91	9109.84	934.12	361.163	5705.54	2282.75	2779.58	6307.04	4755.56	3877.58	5705.47	20037	7021.95	16615.5	1123.43	11403.9	5602.36	3792.62	34863.2	9126	8281.02	10516.7	16921.4	7050.22	4685.51	17049.2	6320.83	7468.41
good	1260153	t3	1534	2	0	7331.31	10671.5	6971.33	30452.7	13339.8	7996.24	65293.4	18009.8	46559.8	36870.2	29969.4	9033.9	15148.7		32409.1	397594	11989.9	21430.2	2475.68	667.799	64706	6709.84	4639.27	10035.4	14902.4	10670.5	9385.18	34681	9731.74	42748.4	6735.52	25641.9	10540.7	10602.9	60350.8	25176.1	19703.9	14769.2	61764.4	9639.96	7501.53	49330.2	14936.7	15869
good	1260153	t6	1711	2	0	5562.47	7871.67	6021.93	23303.8	9460.07	6539.83	52097.7	15602.3	46001.4	31910.3	23146.8	5611.3	12180	5611.3	21430.4	232656	7700.25	14008.8	1739.93	648.075	57071.5	7868.39	4275.7	4175.74	36008.8	20167.1	9140.49	25506.6	13132.7	69461.9	28855.1	13857.5	8900.55	37480	152593	19083.8	16797.6	20480.8	90358.6	11281.4	8303.41	38893.5	12523.7	18557
good	1260153	t9	1879	2	0	4053	4652.49	7066.98	22346.8	8357.52	8440.77	79731	30402.2	63574.9	27807.6	13949	5920.55	15547.3	5920.55	26793.3	438746	10128.3	13241.3	1020.26	295.424	30321.1	4083.67	4701.04	5277.07	12083.2	7518.82	5981.15	22825.4	2689.92	18377.3	6980.14	12166.2	7719.95	31689.8	118144	25357.7	25022.2	17223.2	69047	12705.1	6189.51	51108	15284.4	17693.9
good	1260153	t12	2122	2	0	3596.77	6378.63	9314.95	16518.7	7359.74	6582.09	60383.9	15631.3	71670.1	16976.4	20215.4	2925.57	15851.3	17794	31155.2	284996	6161.92	7586.73	2029.9	587.778	9980.03	8360.57	3993.22	4416.03	14676.3	10417.9	8585.17	26240.3	2720.48	48259.3	18166.8	12921.8	12351	31447.2	71381.2	8696.87	19485.8	11807.9	33903.8	5957.81	6494.25	25193.6	8093.23	9749.67
good	1260153	t18	2631	2	1	5155.73	7112.46	4689.61	19502.4	7712.04	6467.92	37833.8	14066.7	38765.9	16697.2	16279.2	3086.44	9324.07	15078	18875.9	191705	12391.6	7102.94	2021.09	560.31	13505.5	9750.07	4788.23	6069.01	14730.9	13697.4	6780.34	24139.2	5208.8	33724.6	16532.5	14497.2	5619.1	35854.5	76917	11836.8	14948.7	13680.6	58446.9	8575.79	5039.85	25220.7	10565.7	10097.6
good	1260153	t24	3026	2	1	3172	8557.84	32638.5	17840.5	5637.93	5146.19	55156.4	9602.45	71858.1	18295.6	14137.8	2635.9	7819.92	17047.3	9090.19	83929.1	9046.53	20895.2	1940.01	635.48	43859	10246	3224.19	4342.4	20114.6	18441.5	10396.3	14006.2	8150.97	109753	19988.6	13314.7	8376.81	6328.75	82095.8	8130.35	21252.5	16431.5	70897.1	4370.54	10960.9	16822	7320.43	10414.2
good	1198073	t0	1393	2	2.5	2802.04	5567.24	4134.32	16127.8	6527.83	3302.98	32814.5	7595.02	16851.5	11206.4	15582.2	2196.77	10545.7	5370	23201.8	153613	5634.4	6253.99	1361.37	471.837	43301.9	5026.46	3467.04	9148.45	1712.78	4468.27	6400.28	14713.7	5546.1	7974.29	1781.25	17325.2	7581.64	4155.94	26321.9	10861.2	7366.87	9907.01	13850.4	8068.26	3426.21	11127.8	5162.3	6644.83
good	1198073	t3	1514	2	2	3376.01	4929.58	1134.3	19376.4	7302.17	4249.3	18334.3	9379.15	14936.1	13407.5	13979	2318.07	8552.9	6175.4	19232.1	144841	5363.13	8242.33	1060.97	482.221	12516.6	3915.51	2758.72	6151.96	1421.48	3848.04	4761.67	26170.7	3878.2	3838.31	2009.35	15671.7	5889.17	3891.47	24102.4	16084	11267.9	8054.15	9011.34	8651.44	3470.95	17483.7	5448.77	8797.83
good	1198073	t6	1693	2	2.5	5188.83	7559.02	5059.23	20722	10793.2	6642.48	54260.7	12845.1	34892.5	15450.2	20567.3	3140.93	12057.3	10660.8	29833.3	219876	7994.96	11350.1	1578.99	611.352	54273	5684.49	3007.41	6193.57	3170.65	7611.5	7309.9	27353.1	4613.07	6625.76	4137.9	19393.7	5652.88	13004.7	56725.2	17157.4	12332.6	13512.6	34565.4	14409.6	6644.13	18083.2	7416.02	11231.2
good	1198073	t9	1850	2	2.5	6611.67	8698.91	1148.13	21918.5	12299.4	8969.38	34169.2	18334.6	35991.5	19766.2	25691.8	3973.01	15188.8	13281.7	37270.7	390974	8665.71	10795.2	1880.3	683.677	49710.8	7422.93	4000.25	6073.45	3247.18	9012.86	7586.69	45784.9	4277.76	4474.13	5564.69	25078.6	5691.4	12165.9	65689.6	21725.2	18924.8	13823.2	30302.3	12138.3	6215.23	21971.4	9057.16	15474.9
good	1198073	t12	2045	2	2.5	8131.06	13198.8	3935.43	19824.4	10613.1	12294.4	12905.2	32285.9	113284	39027.1	33033.4	4930.99	19934.7	55229.2	33863.7	303082	12206.6	13521.4	2803.21	555.098	36061.9	15805.7	5306.35	6309.99	38423.2	57555.8	19145.4	42683.8	5227.71	6053.06	44414.7	29649.8	11897	16460.9	139927	14684.4	23034.7	22991.1	92835.5	11496.3	13704.3	19806.3	10310	23808.7
good	1198073	t18	2557	2	2	3507.46	7385.96	2458.86	13035.5	6026.19	3132.35	44811	6965.31	40313.7	12239.7	13312.9	2334.28	8606.48	6224.73	17986.8	116178	4409.93	5369.14	1221.66	726.597	6553.93	1933.66	1240.16	2212.49	2956.82	4704.66	3900.66	19240.4	2841.35	2536.33	1414.57	4827.57	7027.69	8652.45	28124.3	13791.3	11834.1	8953.95	16652.9	11046.9	3736.31	14141.7	5174.71	8561.39
good	1198073	t24	2889	2	2.5	3243.81	6780.94	5481.12	15108.7	6357.97	3798.08	129329	9183.3	25462.7	12287.8	24322.4	1660.1	9581.65	4836.55	14046.5	179115	5171.5	10128.4	1892.18	683.613	14343.3	7207.31	2978.75	6321.35	1504.28	4878.25	6931.5	25829.1	6536.84	11712.5	4440.4	13763.6	6304.79	4143.54	30259.1	8234.23	9291.68	9873.7	24752.9	6394.3	3414.58	19201.5	5659.2	10200.5
good	1217554	t0	971	2	1.5	4717.85	7073.5	2523.67	26957.2	8328.33	4087.94	24547.9	9831.91	17745.1	17015.5	13491.4	3761.05	8618.43	7931.84	22604	220524	8912.98	14113.9	3110.92	1092.06	27461.8	6297.31	3786.93	10104.5	5207.29	7038.76	10066.8	30517.5	10131.7	5256.04	1489.77	15210.4	3767.65	4746.11	44995.7	22418.9	18552.7	12383.5	14800.2	11195.9	7573.5	31606.7	11609.9	11266
good	1217554	t3	1143	2	1.5	5801.77	8853	4465.06	32433.2	9547.44	5905.77	19020	14749.6	30551.9	19985.3	16098.9	4753.93	10594	16769.5	21069.8	194165	11643.4	18546.9	973.221	305.966	5587.21	3719.43	1379.98	3533.61	12468.1	15274.7	12538.1	14033.9	5419.11	2759.93	4608.68	7717.94	4770.2	11192.7	108305	31758.1	27264.5	17248.2	39020.9	10921.9	8765.27	45543.7	16026.2	21071.8
good	1217554	t6	1204	2	1.5	4604.01	6678.06	7876.77	34266.4	10336.9	5108.43	27418.1	13379.3	28532.9	18725.5	15193.9	3520.44	9044.79	13648.3	16105.1	181095	7757.17	16029.5	1455.14	398.62	43872.6	4197.69	2457.7	5354.14	14024	11244.9	7713.21	23004.8	6156.66	4700.54	8120.49	14535.7	4225.25	30569.1	81404.4	21571.7	25022.2	12760	30841.5	9936.1	8878.42	50728.1	11723.6	15189.7
good	1217554	t9	1343	2	1.5	4409.58	6752.91	3390.62	43928.2	6773.73	5734.07	57596	16537.4	34232.2	15174.5	10441	3932.28	8834.38	12872.8	15272.8	124109	5586.66	11183.9	1208.81	419.302	88265.5	7001.75	3628.51	10186	2480.77	9442.84	6839.98	14137.5	5510.01	12743.8	4545.66	24882.4	6405.27	25373	70755.9	16332.7	13946.2	11386.6	21345.8	8336.84	5484.92	30023.2	9932.42	10975.4
good	1217554	t12	1478	2	1	6852.44	10285.5	3174.3	36733.4	10543.8	7047.98	33712.1	19233	35713.3	22130.7	15421.5	4417.83	12588.9	15700.9	28394.5	229328	7927.34	9596.01	2073.78	671.591	24253.9	7628.33	4078.28	6515.93	9871.23	11026.3	8929.89	35937	3494.95	4829.83	6252.83	20277.2	6022.06	24095.5	72445.9	17172.7	20854.5	11450.3	16528.2	14345.3	5517.03	40970.4	12130.7	14098.5
good	1217554	t18	1814	2	1.5	9860.78	11730.8	6426.76	30329.4	10399.5	10612.7	56588.7	35157.2	75812.3	26069.7	24947.6	6499.95	18059.3	30277.8	40350.9	417471	12202.5	11332	1995.78	577.749	166472	11564.8	5044.13	11766.8	18448.5	16025.8	12005.4	40757	3079.9	7723.31	11617	28727.1	8374.87	38756.5	75205.7	21602.2	16524	14347.8	35841.5	11144.6	8294.76	38096.2	14822.7	16035.9
good	1154727	t0	1099	2	2	9287.28	16885.6	3078.72	23733.1	10129.1	9220.82	39444.5	29166.3	112712	22281.8	18030.7	6549.17	15376.1	22541	32832.2	427139	12087.5	11484.8	1690.78	420.249	17934	2612.02	1059.89	2754.57	14944.9	9125.59	6646.6	26086.8	3622.38	1210.76	1337.15	9803.16	8713.2	32695.3	95426.7	22009.3	29402.1	20874.2	45513.1	10882.6	8324.43	16897.3	12844.9	15840.9
good	1154727	t3	1318	2	1	7163.63	15955.3	8614.06	23427.4	10369.2	7122.15	33258.7	19490.9	54270.6	27486.1	15275.4	4737.58	9497.11	19878.7	19556.7	260047	7859.7	13893.6	2341.35	596.389	64627.3	11016.2	4129.29	5991.4	19040.4	22169.6	11825.7	25999.9	10625.4	9842.24	20533.3	26637.3	13479.8	33484.3	72549.7	20902.6	33809.9	16299.9	73610.9	10808.7	10087.8	13665.9	10187.7	19800.1
good	1154727	t6	1476	2	1.5	5488.67	11247	5930.73	28310.6	7839.78	4570.96	36737.1	12256.4	26029.8	14777.2	15990	4477.44	7556.67	9647.57	15004.1	152665	4096.84	14039.1	2196.25	718.054	90600.6	9566.62	3768.6	17375.8	4809.1	8336.6	10413.4	21512.4	10935.6	15271.7	6539.84	30721.1	6555.01	34058.4	56418.6	19816.7	26171.3	13241.5	28482.2	9274.02	6165.41	10319.9	7182.87	13472.3
good	1154727	t9	1592	2	1	3702.05	7488.75	2449.06	25319.3	7597.23	3241.97	41761.2	6708.59	15956.6	15212.8	16595.7	3252.26	7485.43	6876.84	16081.3	209884	6024.3	9742.74	1849.77	617.06	39955.7	4607.38	2736.33	8436.86	3998.17	5028.74	7592.53	19034.2	8583.52	9715.07	3516.5	24645.1	5111.46	32266.9	47384.2	20231.4	15069.7	11609.2	21178.4	8437.6	6467.73	9088.51	8119.48	10130.7
good	1154727	t12	1769	2	1	4030.03	6640.96	2125.16	29365	17381.6	4028.9	21507	10306.9	24844.6	18125.2	17433.2	3703.42	8591.26	8588.11	16166.2	168816	5326.48	10121	1378.65	393.877	24295.8	4048.95	2384.64	7953.02	4250.38	6412.34	7361.99	18333	6406.06	5508.04	3125.36	27449.4	4495.04	26403.7	63094.4	17145.1	15211.1	13848.7	20296.4	9187.24	6355.87	7786.68	7766.34	12718.7
good	1154727	t18	2366	2	0	5543.79	12920.7	9778.52	22249.2	11458.1	5747.39	30190	14668.1	69516.2	32116.3	27313.2	5106.6	12425.7	20471.4	23798.6	157812	6811.03	25799.7	1963.49	498.301	6961.11	8176.47	2332.94	5695.23	23456	16741.6	12345.3	17379.4	8272.29	9188.59	16419.1	23982.1	11043.2	37645.5	106058	14801.2	23978.4	16576	76575.5	6906.63	13792.3	6986.65	10351.7	17273.6
good	1030425	t0	428	2	6.5	6483.94	11579.6	3611.58	24089.6	9015.4	13174.7	15904.5	34112.5	68171.7	28620.7	27422.7	6050.32	12997.9	17761.7	25009	299786	9413.28	13964.5	2223.23	592.738	77511.8	12975	4792.47	6654.33	10243.3	14511	11848.3	35753.3	6594.23	34897.6	4422.77	33848.7	4997.89	24778.9	85375	19346.1	26051.2	27662.8	27416.5	11766.8	7697.99	12905.1	12930.1	22611.8
good	1030425	t3	632	2	6.5	7026.77	9149.62	4260.91	21279.7	9493.54	10808.6	30362.1	29426.8	52358.4	22807.4	18952.8	6444.17	13036.7	15704.6	31403.7	334104	15106.8	9157.64	1889.17	517.818	40217.3	12072.1	1742.61	7125.07	16100.1	12116.7	10535.6	41169.5	4733.79	23275.2	16539.8	28190.2	4425.68	23807.1	61939.1	37507.6	26557.9	15628.5	35603.8	13513.8	7985.51	19267.1	10290.8	22421.9
good	1030425	t6	835	2	6.5	5946.35	10916.8	8468.38	19622.6	9968.41	10415.2	10143.3	23137.5	91338.6	24461.7	25927.5	5272.65	12808.6	16009.1	23625.1	229328	16592.9	16217.1	2006.92	547.561	10609.6	6206.44	2121.15	3544.97	23494.7	15274.7	9945.09	23701.8	9384.66		7443.71	13806.1	6250.71	18895.7	85679.4	11535.4	18263.1	14715.5	36953.7	9930.93	6365.42	12866	9737.4	14869.4
good	1030425	t9	987	2	6.5	9140.1	14935.1	10873.4	21520.1	8674.22	9266.18	11123.3	18148.3	54828.3	43429.3	27801.3	6185.25	51883.5	28595.3	22341.3	207369	11460.5	29161.6	4283.56	843.435	142406	9701.5	6234.98	9939.63	49370.3	80704.6	19471.2	40006.1	24723.5	47286.7	40362.5	31222	9480.31	26383.4	132531	15329.7	29760.9	19983	97446.6	9808.41	13620.6	11655.2	11630.9	23705
good	1030425	t12	1128	2	6.5	6932.78	11318.9	5931.36	19498.1	7465	5546.52	12436.6	10100.6	22653.6	14028	16694.8	3609.7	6464.86	9630.93	13630.4	140226	6944.08	13757.6	1898.74	722.735	107045	7465.56	5122.4	7199.66	15649.5	16498.1	12939.1	30793.2	12036.3	25982.5	25955	18509.8	3651.7	22243.7	96377.7	19160.1	17903.7	13112.5	43114.8	9234.47	7943.44	6779.6	8564.41	15951
good	1030425	t18	1391	2	6.5	4885.06	6364.39	6901.66	15545.4	4271.13	3329.54	5937.32	6975.06	17139.9	15362.9	15377.2	3642.47	5190.27	8153.89	8007.76	35630.1	5820.75	13237.9	1780.63	489.789	28744.1	4827.06	3536.98	8098.87	9801.16	10483.5	6158.72	13505.3	12932.1	11508.5	16256	11989.2	3744.51	16317.5	79884.8	11786.9	12508	8730.89	29443.5	7426.93	5406.7	20221.7	9456.14	18084
good	1030425	t24	1690	2	6.5	5886.39	10338.2	7735.02	22956	8412.21	6460.48	26521.5	12116.8	36703.2	27490.4	18109	4951.48	7812.45	16087.4	10765.8	112842	7916.51	23973.1	1556.58	536.409	52454.7	6405.61	3696.54	6621.35	20884.3	19614.1	12939.1	17882.1	15338.9	35816.6	23561.7	23918.1	7481.65	55752.4	102222	19232.2	26116.2	21451.6	58921.4	8494.68	11793.4	24349	9345.2	21502.5
good	1216298	t0	1500	2	1	5887.69	10029.9	2128.2	45123.8	9416.24	5997.67	33296	13523.6	31094.8	24442.8	20396.9	3906.45	10867.9	9177.31	16731	129359	6766.01	14283.8	1618.51	713.884	30000.4	4810.94	3745.09	8135.95	3219.18	9125.84	8335.03	25482.4	7443.62	3707.3	3005.16	22979.3	5640.18	46055	43699	18521	17422.4	12596.1	13151.9	10299.5	3943.15	20964	9444.26	18053
good	1216298	t6	1795	2	2	8201.61	8919.24	3121.76	31281.1	9075.63	7555.42	17855.7	23302.9	44333.4	20917	27827.2	4303.45	11854.1	19360.9	14683.9	152827	10275	14649.8	1560.34	774.437	90548.1	6147.68	4226.03	8942.65	10285.9	19121.8	8628.69	30411.7	4442.9	3650.98	8270.19	26521.3	7544.17	35739.6	55901	14001.2	20087.6	12553.4	27688.9	10799.3	4643.47	22052.7	7615.11	17681.2
good	1216298	t12	2378	2	1.5	5303.69	6666.45	10184.8	20626.8	6570.85	4228.25	97783.7	14619.6	54633.1	18243.1	15037.7	2716.77	13468.8	11500.6	16009.3	72493.9	5831.71	9419.8	1263.84	410.468	18931.8	5349.11	2714.12	4019.33	6047.58	4942.46	6160.28	18138.6	2359.57	1932.44	3420.45	16159.6	7990.79	21882.4	33478.4	8295.62	11984.5	9830.9	9856.97	8149.99	2945.26	9414.72	5069.58	9916.63
good	1216298	t18	2700	2	2	4108.28	5729.91	2168.89	18931.2	6311.86	3850.87	160843	4011.27	15232.7	9731.45	1431.79	4053.16	3798.88	6437.17	18487.8	119823	3249.91	5645.89	763.229	253.48	28837.5	1378.28	1303.18	5194.22	4291.77	3610	2593.4	9544.9	2156	1593.27	1094.12	6267.85	6502.86	19747.2	28856.3	8524.74	9583.85	7571.3	10550	5448.07	3248.12	10175.7	5796.13	8203.47
good	1216298	t24	3102	2	1.5	6125.12	11423.4	3993.92	30653.5	7256.56	4021.61	7154.02	10759.8	28017.8	10281.6	10284.9	3340.47	6868.63	8164.32	11241.6	51095.8	9258.79	13578.9	1817.65	549.648	26258.9	5823.5	2616.31	7245.17	3841.56	6316.74	7414.87	17000.3	10856.9	2592.53	3634.9	33106.8	4071.15	28044.6	46672.2	14351.1	20076.6	11415.1	19154.2	11346.3	4701.43	4976.66	11373.3	13298.7
good	1141707	t0	1443	2	2	1923.67	2522.55	1099.52	18751.2	2795.65	722.889	32832.7	1297.88	4511.73	5206.68	7764.41	1310.74	2401.22	1645.18	5004.52	14568.5	2332.88	6515.24	494.156	458.426	16915.2	1296.02	1631.52	4803.16	1020.41	2501.92	4223.64	9770.08	3793.58	26117.5	2050.26	5061.93	3207.86	12597.7		4240.06	3592.89	3255.22	6556.41		1500.38		3249.31	3224.23
good	1141707	t3	1566	2	2	4615.04	7193.29	1900.75	44033.4	9228.69	3773.41	20750.6	7312.16	21508.9	14723.6	27876	4226.76	10312.1	5816.02	20072.9	126056	15668	18654	1223.25	680.606	28773.2	3938.55	2793.81	8538.01	4318.11	5326.49	7591.53	22980.6	10258	23649.7	1862.12	25620.6	3833.87	23883.4	38788.9	23951	25539.3	10630.6	18116.3	8982.73	8756.91	5014.13	10841.1	10676.3
good	1141707	t6	1688	2	1.5	5364.66	5631.68	4188.53	49723.3	9863.61	4700.57	26096.8	6808.16	26304.3	15898.4	21668	4412.69	8624.92	8087.36	18168	69503.3	9300.82	20085.5	1370.27	720.398	17448.5	3316.81	3469.99	10352.6	3723.73	5409.06	7167.34	17011.2	7884.05	37726.9	2712.78	22950	5258.58	29660.1	32737.4	17969.9	11751.5	12446.1	19772.5	7963.54	7152.79	8475.27	9890.7	10042.6
good	1141707	t9	1894	2	2	8326.67	15325.3	2685.01	35793.6	7261.88	5671.49	9006.5	13763.5	41942.3	13711	27495.6	5138.28	11801.1	11817.8	16558.1	114187	8678.87	16978	1361.49	668.406	31538.6	5688.08	4740.41	8487.64	4567.46	6650.21	8181.9	19531.6	7535.5	24641.5	3277.67	30809.7	4758.8	30369.8	67276.5	23490.7	17277.7	13771.7	37308.2	13093.7	8063.64	12835.2	14577	13190.2
good	1141707	t12	2113	2	1	8112.52	12257.3	3103.84	27597.2	6293.43	8212.05	5785.71	15266.6	57063.6	18819.2	15429.7	5774.82	10490.6	26220	16363.3	41743.8	11304.6	17950.4	1425.35	631.338	22126.7	5534.34	4032.24	6004.02	32833.7	25306.6	8186.09	19797.2	7573.28	18615.9	11847.1	17469	6300.08	25537.7	70898	16965.4	18325.7	17922.5	76076.5	8846.43	14274.7	11965	13483.4	19966.7
bad	1237537	t0	1198	2	2	2755.92	4950.05	1631.68	20477.2	4805.47	4016.77	24993.4	7748.8	23774.5	13637	14545.4	2937.52	8231.03	12934.7	14039.1	109144	3531.1	6617.74	747.233	279.289	20390.4	2171.42	2015.99	5040.76	11447.2	3208.56	2748.32	10984.5	1123.37	2504.08	1524.24	5796.88	7003.8	15105.4	27667.9	10810.5	9278.46	8957.02	8794.6	8575.8	5452.12	4792.27	4633.19	8255.47
bad	1237537	t3	1331	2	2	2648.89	4007.83	1924.4	18398.5	4240.56	3937.09	35632.5	8841.61	24846	12292.3	11282.1	1075.73	6520.73	15355.4	17679.7	110127	4366.38	4016.24	1104.91	427.602	10608.8	3795.21	4028.61	5217.81	9343.48	7239.7	4156.6	25502.2	2390.64	1156	8454.89	8070.15	4672.64	9309.46	32538.8	8855.94	12318.1	6432.62	17769	5429.28	4258.51	13056.8	4253.1	9660.75
bad	1237537	t6	1489	2	0	4761.67	7588.51	2605.39	21375.2	6191.57	5902.63	40925.8	8745.25	30657.2	14378.1	18714.2	2847.27	6265.62	20097.7	24475.9	251089	6237.33	4295.42	1687.4	699.016	20315.7	5497.48	4558.85	8401.64	12381.5	10805.9	7041.08	35511	5142.13	2349.3	16280.6	13793.1	4151.45	12124.7	52995.5	11696.8	16993.8	9414.11	35612.9	7405.27	6663.45	16529.9	6570.62	12862.5
bad	1237537	t9	1635	2	1	3547.56	5473.92	2922.22	22830.6	6068.73	4716.93	48251.2	6970.5	21151.9	10714.7	17348.4	1870.05	5861.84	8208.43	17911.9	185067	5282.61	5725.03	1484.16	766.489	16826	4761.84	4595.15	8549.81	4476.1	5592.35	4783.2	26696.2	5511.98	3499.96	5431.67	7783.48	4330.99	9412.9	29505.9	11648.1	17182	6487.05	10938.7	6587.82	3662.05	14542.6	4788.23	8377.59
bad	1237537	t12	1788	2	2	3656.39	6446.93	7136.06	25313.7	8056.6	4672.79	69973.9	5924.65	19481.3	16386.4	21572.8	2138.7	7056.81	11336.7	22313.1	186919	6246.06	5103.99	1566.38	736.99	6842.17	5050.85	3299.14	8329.36	5459.2	6651.44	5656.3	20439.6	5578.14	5874.56	8010.06	13403	6064.32	15427.7	44867.7	12317.1	15395	10032.3	28623.2	6161.5	5831.68	10466.5	6471.75	10930.2
bad	1237537	t18	2363	2	2.5	2952.91	4529.09	5737.16	20696	5823.2	4344.52	10879.5	7536.05	27079.1	11919.1	15361.9	3545.69	5600.87	19378.9	14377.6	82763.9	4765	6706.64	1083.79	443.822	4492.84	3560.13	2493.68	6067.57	11831.7	9949.69	4767.64	17775.8	5879.12	2628.93	11759.8	9771.96	3329.35	33439.7	65367.7	9246.91	13107	10734.3	39653.3	6445.43	7527.21	12473.7	6387.45	17008
bad	1237537	t24	2707	2	1	3678.47	7097.85	5810.33	21646.4	5640.05	5671.3	17535.7	9184.65	36267	13728.9	15174.8	3285.17	5771.14	23353.7	14927.8	88835.3	6984.78	7405.33	1345.83	325.34	4065.92	3970.12	3272.19	5970.96	12323.4	10884.6	4523.77	15771.8	5228.75	1683.27	14578.7	11073.5	4593.1	27253.7	63206.6	9083.86	15193.9	16619.7	38241.8	5475.34	5143.24	17824.1	4650.71	15584.7
bad	1219082	t0	1111	2	2.5	6023.68	6454.8	6087.25	20472.8	7175.38	8705.07	71393.1	21422.6	59432.2	19328.2	10827.6	4946.01	9292.83	19342.5	30052.7	303538	7533.51	5717.15	1687.14	472.342	32153.1	7462.42	4316.36	7610.63	4731.33	8442.42	6138.22	34585.5	4472.52	2300.59	2530.92	17941.2	4791.04	35369.8	65345.7	10659	14571.6	10695.8	21440.3	6310.99	5388.2	32625.7	7579.22	11976.3
bad	1219082	t3	1216	2	2	8310.85	12591	12236	22860.9	10979.4	13025	193785	33126.9	94807.9	26932.9	19731.2	6924.61	13880.7	34464.4	55000.5	875910	17664.7	6016.19	1942.44	579.117	38208.3	10649.2	4981.07	6485.74	6025.54	9814.04	7025.78	64149.4	4172.24	1830.74	3503.45	25772.1	4139.26	36802.2	79260.3	18643.2	26159.3	12808.8	22841.8	8910.8	7753.93	29293	6946.61	17044.6
bad	1219082	t6	1291	2	3	6857.72	14149.2	19149.5	15257.6	5597.65	8748.1	141765	16878.7	122178	28047.8	12007.5	4095.09	6780.17	35876.9	21119.2	363807	7854.83	7307.48	1782.2	266.143	42409.9	3455.29	1898.74	2613.71	40479.5	30746.5	8795.8	22769.8	5783.21	655.856	11693.6	6197.01	7308.93	28494.7	116954	12814.4	20268.7	23825.2	84948.1	6327.24	19682.6	11842.6	10576.4	21084.7
bad	1219082	t9	1428	2	2.5	5254.4	11162.5	8794.42	17995.6	8324.7	7461.85	100174	15374.6	39350.3	22984	13451.2	3925.77	7009.98	15101.1	27793.1	453197	5611.08	6422.44	3187.92	716.787	6329.46	8432.65	5825.16	8691.02	6857.74	12203.8	10158.6	43751.1	9167.88	2325.7	9931.44	12650.6	3004.1	23768.6	52055.1	19054.3	33436.8	11535.2	29352.8	8266.24	10071	8799.61	10000.7	16137.8
bad	1219082	t12	1604	2	2.5
bad	1219082	t24	2476	2	2.5	5101.77	12682.9	7541.52	21896.7	6597.03	6903.86	44158.5	10247.2	40975.8	21981.6	13020.3	4187.8	6078.14	20489.8	21170.7	230539	7733.73	5383.45	884.762	195.325	3742.18	2869.87	1363.68	2526.82	12272.7	16608.6	2094.97	13149.5	4823.86	1386.03	5400.02	5571.56	4041.28	50713.5	67098	14819.4	26165.1	15440.5	62064.4	7660.71	16251.1	11797.1	13457.8	19782.6
bad	1215133	t0	1247	2	2	4633.14	10383.4	2917.16	19264.1	6226.85	7439.15	21895.8	16263.1	59141	21774.1	10998.5	3557.46	4870.08	38952.5	9204.92	113931	8604.19	7026.14	705.916	217.987	24243.2	4888.95	2505.88	4282.9	24544.2	31372.3	7530.77	12493.1	7278.46	1875.97	20942.2	21936.5	3884.06	37945	99849.6	12703.6	28442.7	19462.4	81105.7	6729.5	15103.3	8305.75	7990.69	21757
bad	1215133	t3	1397	2	2	6650.41	14500.2	4550.45	24082.2	7273.97	10848.3	26883.6	22741	71260.2	29172.9	13811.1	4623.41	7559.87	43030.7	11941.9	142123	11012.7	9714.04	1466.91	269.674	62072.4	7657.03	4078.81	6403.75	21168.1	27151.6	6709.05	15432.2	7937.68	1821.04	26693.3	19023.7	6850.29	45956	123582	13732.5	37257	20990.4	88592.1	9184.43	13902.6	8401.64	9233.02	24745.5
bad	1215133	t6	1556	2	2	5052	8813.56	621.745	23291.1	8493.89	7096.48	15998.1	21754.4	51128.7	14465.9	14724.8	3840.84	9713.52	18195.7	18271.7	190690	5862.54	5892.69	1442.32	741.025	65305.9	8248.7	3937.34	7071.48	4165.82	6784.1	6434.19	33558.5	4911.52	4167.74	4042.53	25534.9	4242.78	30212.8	34541.6	13509.7	14207	12623.5	32119.9	9441.27	4844.59	6859.39	6890.24	13630.1
bad	1215133	t9	1710	2	2	8039.46	10580.4	1948.43	22534.6	6622.51	10236.6	20246.9	31660.5	107223	18081.4	16145.8	5063.39	11823.8	54750.5	19603.5	195836	14011.1	7499.4	1403.9	407.214	78846.5	15200.4	5884.05	5928.05	20560.4	16945.5	7371.79	25910.2	2711.64	1683.53	24315.6	27227.1	6414.76	27770	66258.1	13223.6	19104	12403.6	44753.7	8322.7	7286.52	11482.7	6751.63	15623.6
bad	1215133	t12	1870	2	2	7672.7	12029.9	2033.76	17826.4	4827.71	11133.2	25013.8	21110	147466	25526.9	7039.85	4107.17	7674.95	61095.9	9443.74	66779.8	12172.8	10524.5	772.488	200.566	19962.1	3264.62	1176.67	1787.94	37367.9	22748.9	7375.87	7324.8	3957.44	807.123	7892.91	6118.04	4448.77	14629.2	119884	9775.48	19044.2	21191.3	42914.9	6504.1	9856.51	15680.1	8213.39	17512.1
bad	1215133	t18	2408	2	2	7372.9	14786.8	3570.05	24482.7	6909.92	11441.3	8768.83	22040.8	98724.2	31404.2	14912.2	5235.48	8704.67	43851.1	11053.5	85565.4	9246.82	12792.1	2251.55	516.221	13751	15219.3	4889.83	9214.6	42358	40216.4	12395.1	20380.5	19304.8	5793.29	35886.1	35323.4	5646.92	23179	133042	11745.1	19283.6	23998.6	93377.5	6973.77	9637.44	15807.9	12728	23431.3
bad	1215133	t24	2815	2	3.5	4557.54	9184.58	4743.18	22228.6	3813.34	5191.6	18769.2	17448.5	54709.8	17228.9	6002.91	3326.14	4269.45	29780.5	5720.35	26744.7	4622.93	6041.36	1286.69	276.225	81099	10272.3	4608.06	9866.89	24782	36193.2	12827.3	9649.26	14199.3	3048.37	33413.5	29171.7	5032.25	19964.3	101431	10059.7	15785.1	16000.5	35525.9	6942.35	6602.49	22306	7008.31	17083.1
bad	1247010	t0	1239	2	1.5	4053.12	9387.13	1694.41	31612	8743.46	4432.16	44289.1	7474.81	27387.4	14785.8	11268.8	3703.94	6148.02	11720.4	18500.2	210829	7093.47	5989.9	2370.87	540.203	57181.8	6188.34	2701.08	10841.8	4024.25	7503.75	7640.04	26996.6	11731.4	9828.82	2433.04	24079.5	4262.19	19616.3	69272.7	19340.3	20289.3	16577	17803.6	7082.09	5266.25	24096.8	7800.33	12840.9
bad	1247010	t3	1381	2	2	2990.9	7667.99	5939.55	27016.3	8484.28	3770.24	41173.7	6264.68	23656	17870.9	10670.6	2735.16	6218.3	8091.62	17458.6	112193	5437.57	5379.69	1786.6	423.613	4795.76	5705.95	3291.18	7347.83	3997.82	5878.59	4728.37	17243.8	7257.57	6147.51	1996.55	16652	5241.2	42222	54995.9	16648.9	11739.5	12545.5	16987.4	8038.97	4276	13288.6	5212.98	8543.28
bad	1247010	t6	1544	2	1.5	4242.42	12002.3	1961.14	33258.5	10170.7	6733.77	59654.7	12690.9	39920.2	23068.2	11475.9	4389.05	7979.25	13317.4	20543.3	204577	6613.4	6889.95	1941.06	542.571	32614.4	6808.54	3200.63	11451	4928.95	8653.01	3483.08	35511	9135.3	6456.2	2528.68	22478.8	4553.1	34177.8	65119.9	19773.7	19997.1	13175.8	25088.6	10168.7	4349.74	26209.5	5851.5	12787.3
bad	1247010	t9	1695	2	1.5	4464.25	11241.6	27165.6	34310.6	13875.2	5743.93	334160	15249	126439	20424.2	17896.3	4146.12	13595.3	15998.6	30322.6	124436	9686.34	10968.3	2696.15	667.744	35160.2	11603.2	4254.27	11436.5	7327.81	12106.2	8146.17	28054.5	6495.99	14193.6	6817.52	24474.1	12362.4	37565.4	63549.6	9082.75	15417.8	13066	48098.4	6311.93	5562.95	22475.5	4784.4	12380.5
bad	1247010	t12	1777	2	1.5	4879.46	7408.74	4530.92	25059.2	6754.47	7155.27	24285.5	25027.3	59275.8	16676.4	16390.8	3892.33	10186.4	17726.1	7735.06	103462	10211.7	7913.88	1420.76	383.352	22444	11126.3	4901.01	8572.12	2818.37	8146.5	3913.5	26388.3	3666.27	1790.84	4618.5	26236.2	5551.42	31297.6	72511	12772.8	9674.86	14532.1	26767.6	9649.93	2832.06	17624.4	7123.17	11864.1
bad	1247010	t18	2467	2	2	3625.26	8003.64	438.007	23370	5792.78	5850.49	27565.1	8936.95	47358.4	15398	13180.8	3422.39	7323.69	9959.9	15367.8	70243.7	9362.13	8811.56	1250.45	463.208	21365	3130.52	2193.04	5918.31	7820.52	6183.9	5560.85	12967.8	4610.62	1307.84	1989.42	11542.9	5245.06	16234.9	35409.8	7413.93	10254.3	9409.01	7858.46	5756.45	3669.68	4849.05	5528.72	7180.02
bad	1038482	t0	1441	2	3	4333.18	10178.1	235.861	21273.4	6509.77	6238.76	20080.4	11173.6	31799	16994.4	11622.6	3665.63	5534.63	8212.8	11051.4	110209	4653.34	8243.12	1594.72	948.486	25373.7	8556.99	3446.47	11759.1	4767.58	8707.33	8212.04	25712.6	14540.9	6277.95	2172.3	22653.5	3407.98	17027.7	36821.2	10179.8	12606.8	8694.1	19893	6610.21	3554.48	13323.2	6297.76	9230.93
bad	1038482	t3	1568	2	3	10645.1	3666.41	1101.84			8050.21	12370.9	5754.94	18114.9	24662.7	10439.7	6487.11	7575.32	17764.4	14331.9	412499	5362.58	1021	1364.28	2583.15	38634	22498.8	4332.94	1888.61	82871.3	17096.8	1175.75	22688.8	11592	1712.18	66179.5	7591.59	6290.99	25775.6	83711.8	9234.99	15253.3	17150.5	57138.4	6881.94	6199.78	7447.85	6599.71	14512.4
bad	1038482	t6	1713	2	3.5	5863.69	15315.1	4747.24	30602.5	6335.43	7026	3554.18	12334.9	57971.4	26574.3	12530.6	3916.41	4543.7	22874.6	6872.08	62562.3	7053.25	9867.49	2136.13	889.394	33232.8	15668.2	5628.32	9103.68	23085.5	32450.6	14175.8	8790.48	26828.8	13345	28076.4	44674.5	4933.88	29498	94312.3	14351.3	25316.8	20984.4	26294.8		2755.12	5287.37	8988.83	22587.7
bad	1038482	t9	1886	2	3.5	5249.51	12417.2	3721.7	27152.4	7579.98	7707.42	12388.1	17218.8	45461.6	18373.2	14833	4932.76	6213.95	12561.4	10945.5	128540	6307.92	9387.9	1978	569.001	45061.9	8039.34	4568.81	9655.51	5047.66	10490.4	9310.6	24228.5	16542.9	5272.35	5317.89	43185.9	2537.73	35378.9	64551.4	17421.9	20904.6	16223	47818.5	7970.78	7185.57	5257.91	13069.9	19744.4
bad	1038482	t18	2701	2	2.5	4299.28	12337.6	8493.5	24481.6	5950.7	5276.89	78546.1	19185.6	91499.2	15130.8	20873.4	3273.36	7223.46	9010.91	10550.2	80791.4	12622.1	19596	1648.43	515.757	7786.69	9089.69	1793.07	5786.89	5743.97	6023.68	9378.54	22201.5	7026.91	9796.19	8353.41	23508.8	5799.94	29830.1	61517.3	8198.36	19846.2	12607.6	75761	5060.44	8344.48	3789.7	6080.91	10694.5
bad	1038482	t24	3139	2	4	8794.29	20491.5	12564.8	40605.7	16151.4	11426.1	67194.8	26359.9	149748	30395.4	19575.9	7120.96	13759.3	50710.7	31049.3	330484	17521.3	16954.1	3402.48	709.412	29763.9	15839.6	6789.07	13085.1	33057.8	39007.3	16559.9	32241.6	18291.2	12353.1	27867.5	31730.1	9323.32	44304.9	86273.3	17172.3	26758.6	21666.2	134118	10814.8	12843.7	11663.2	11019.5	22747.3
bad	1130654	t0	1091	2	1	5708.21	7438.44	1023.46	22656.9	7385.62	7026.94	44341.4	21169.3	57896.1	23349.3	25355.4	4232.57	13383.5	24524.8	23245.6	346112	11654.7	7988.02	2404.15	695.986	36283.7	10730	3801.87	9221.69	5752.54	7092.04	7154.57	43215.3	3921.01	5757.09	2874.79	17707.4	5704.66	15840.2	30536.2	13157.2	11036.1	13876.6	20375.8	9997.34	4633.21	7748.38	11030.6	10790.1
bad	1130654	t3	1206	2	2	5356.84	11346.3	1977.85	20144.5	7214.33	4818.47	45619.7	15506.3	32039.8	13430.6	12187.9	3802.78	6743.54	17609.2	27563.5	216634	6464.05	7058.54	1007.22	452.26	4778.97	3025.41	1818.59	4037.37	6972.95	9462.51	3555.88	28708.2	3487.21	1393.61	2001.86	9315.92	4700.53	12388.1	39042.5	13482.1	21858.2	10027.5	24750	8594.12	5239.59	11586.1	6841.36	14270.9
bad	1130654	t6	1306	2	0	6716.15	13895.5	3510.72	27258.8	7592.82	4985.74	26996	9312.65	41094.3	19036.5	15163.8	4106.35	6416.19	14360.4	16368.5	142165	7364.93	12377.8	2218.55	756.827	35814.6	5983.75	3139.58	9033.03	10444.3	11426.5	7380.46	21109.3	16672.4	5314.51	7371.09	21072.5	3548.55	15435.9	49354.1	12827.9	21278.1	12333.2	62249	7534.9	5756.66	9378.03	12999.2	18277.6
bad	1130654	t9	1429	2	0	4651.44	9787.09	2691.38	37363.8	7867.97	3926.94	22005.1	7285.83	20783.1	14592.2	13142.6	3922.24	6274.15	9987.13	16810.3	133857	6719.54	10674.7	1115.09	1579.45	30517	5908.7	3814.79	13078.2	4524.1	4391	6424.91	25172.9	5463.47	4679.75	2683.01	25949.7	4287.35	14897.1	39140.3	16382	19184.5	10695.1	21171.8	8672.15	3628.94	15838.6	9658.83	13868.1
bad	1130654	t12	1619	2	0	12120.8	21759.6	886.515	0	0	9825.88	51699.2	4598.99	14126.9	39681.5	19072.8	8495.31	11057.8	11711.6	38378.5	979172	6210.49	#DIV/0!	3329.73	3131.97	35772.6	8667.53	5281.39	6070.19	28517.2	6028.92	1323.41	50173	7519.08	3587.31	17741	5797.82	3955.93	14351.8	38963.6	19344.5	18362.8	11824.7	42972.4	8438.5	5562.99	12536.3	11629.3	15879.8
bad	1130654	t18	1909	2	2	5636.3	11152.9	2708.28	49916	16342.9	7531.68	41179.2	14099.8	42198.8	31493	28763.6	6702.35	11917.3	24323.2	34629	231317	8113.56	20049	1792.9	867.118	49527	8252.32	5025.55	10289	6244.54	10207.4	6819.28	40323.4	13428.2	8791.48	8209.75	31994.9	6237.88	34909.8	99051.8	23773.9	24868.4	16764.9	64600.5	10367.9	7757.75	25788.8	12174.5	18873.1
bad	1130654	t24	2416	2	1.5	7042.8	20136.1	1714.85	40927.7	10175.8	8311.63	21467.5	14211.7	47677	23263.3	29273.2	6305.1	12697.7	18186.2	29985.5	251794	10402.2	11785.6	2036.18	622.706	30874.3	9266.49	5138.4	16922.8	7199.04	7488.16	7926.05	35634.8	13707.4	1138.23	4187.12	35261.2	4613.79	31971.1	95797.7	21718.8	23856.6	17597.7	41892.8	9373.42	6053.21	19676.9	13177	20654
bad	1194008	t0	1678	2	4.5	5810.62	11603.9	2750.4	24504.4	6784.09	8194.06	164825	16391.4	67280.8	14002.3	26167.2	6060.52	8021.98	14770.2	18044.4	128769	7344.71	10586.6	2104.52	526.556	74871.9	7509.8	4108.89	17529.7	8191.62	8841.74	7941.32	17341.8	8835.03	13034.4	2745	27487.7	3580.19	32476.3	94708.7	14086	22113.1	17780.8	27878.7	8573.49	4120.96	22206.6	9175.11	12768.3
bad	1194008	t3	1875	2	4	9337.25	10956.7	2094.3	18803.6	4937.54	7538.87	46263.2	18344.6	83305.6	14752	22651.6	5429.39	9251.37	16937	20191.6	166950	5830.8	9104.4	1345.38	363.876	15000.5	4700.42	4328.58	5704.58	6090.8	4739.92	4587.04	18594.6	2352.88	6251.55	1826.41	12989.3	2328.4	21006.2	65534.8	12823.2	21003.5	13430.3	25135.9	6362.97	2914.52	17309.2	7581.82	13330
bad	1194008	t6	2081	3	3.5	6217.5	5930.31	8453.6	13134.2	6308.72	9025.99	36671.4	25835.7	58362.8	14441.6	17862.3	4201.54	11072.7	22852.1	28506	155873	8087.63	8240.77	1728.65	846.559	23791	8001.81	5323.41	5191.68	10127.8	7534.49	7149.38	25233.3	2895.49	16394	10269.9	27264.3	9142.14	17946.1	67160	10523.3	10047.5	15225.9	89212.2	6193.55	5797.76	21052	10310.1	13188.5
bad	1194008	t9	2384	3	4	5445.59	7758.69	38143.5	15438.8	5826.38	3719.23	68027	19883.7	55874	11448.5	18786.5	2981.05	7988.4	9993.45	13828.8	73541	6997.2	6684.13	2473.11	623.909	18292.8	9677.74	3269.88	4907.64	12936.2	9093.6	9676.1	16080.5	5422.96	30183.6	15584.7	19224.8	4689.68	18560.1	55238.7	7439.93	9524.34	11925.6	39890.8	3941.93	6488.32	13013.9	9906.64	7355.11
bad	1194008	t12	2597	3	6	6955.59	10093.8	5629.01	18809	7200.86	10762	14264.7	22345.3	41534.1	18736.3	19508.2	3595.38	8712.92	15926.5	18390.5	118367	6502.76	10532.4	3293.84	598.694	51115	9829.54	5981.31	7462.46	20194.1	21507.4	12835.6	25571.5	11661	21589.3	26342.6	29225.9	2652.54	22063.2	87230.9	13388.6	20619.8	21072.9	165459	7241.16	11176	30664.7	22338.5	22944
bad	1194008	t18	2951	3	5.5	5290.64	7614.08	20682.6	19694.6	6208.75	8426.76	13615.1	15731.1	50248.2	17243.2	18882.7	4497.26	8258.25	32070.9	16030	70342.9	6485.13	7241.66	2844.27	561.735	23618.4	8269.37	4406.44	4487.83	35904.6	33143.3	14149.4	15675	10702	22404.6	45164.3	24749.7	6079.21	33752.2	158997	12488.7	16320.2	30640.1	268940	7847.2	15860.9	19954.7	15452.3	26421.5
bad	1194008	t24	3318	3	6	1751.14	784.199	1145.51	6574.18	1297.94	1326.69	3766.87	2552.65	11594	3243.1	7366.4	1928.03	2699.46	5323.31	8708.3	15673.2	1641.39	1199.27	858.978	353.534	3654.32	1408.14	1638.44	2084.37	4108.81	3402.24	1335.59	5625.88	2635.8	2506.39	9563.69	3654.19	2163.51	9894.94	32276	4814.29	3259.11	3940.8	39546.9	2680.38	1502.6	29487.3	8958	7323.51
bad	576652	t0	1325	3	2.5	5660	7863.27	323.943	23193.4	11009.8	7659.86	38354.9	12385.1	23757.3	24566.3	14919.2	3477.41	12167.3	11022.2	28358.9	274596	6963.07	9230.76	1852.22	660.697	40076.5	4136.67	3223.72	5388.8	9339.23	7238.67	8496.22	49954.1	4031.13	4331.93	2191.59	15844.7	3863.03	17045	47454.7	18776.2	16355.1	15729.7	35321.9	9252.83	9229.15	19950.6	9478.26	17422.8
bad	576652	t3	1502	3	3.5	8204.15	9579.39	3089.18	38692.6	14442.6	11025.1	67096.4	25269	37741	31088.9	24486.4	5499.15	18361.3	24788.1	47957.2	380608	11234.6	9963.11	2414.25	556.736	60070.8	7188.48	5065.89	9038.33	17633.8	12019	12976.3	62599.6	6138.44	5831.71	4277.49	34167.6	6951.72	20532.3	68409.8	17285.7	17098.5	19886	63849.1	10015.3	13953.2	27843.1	11631.5	24341.8
bad	576652	t6	1705	3	6	6674.22	5188.83	10007.9	17517.2	6084.62	8505.77	40829.9	51770.3	49682.4	20521.8	10271.5	6331.15	11960.7	18610.9	24522.6	207723	296.881	7938.61	1626.64	240.328	88825	5073.5	3524.51	4554.27	9573.46	7660.33	8933.45	33812.7	4156.49	3018.7	2376.72	25053.7	7580.19	10556.5	51687.1	9154.16	11867.2	12338	19159.4	9495.14	7880.46	25871.4	10002.3	13870.5
bad	576652	t9	1837	3	5.5	5262.4	8216.53	950.225	19350.4	7065.35	3729.26	49750.5	13657.4	18876.7	13089.8	8254.26	2407.35	9095.48	14763.9	22725.7	111132	6285.75	8507.64	1169.25	377.56	11344.4	1994.01	939.671	1215.97	8812.05	6576.54	5046.38	18439.6	3913.43	2489.08	1931.55	7523.03	5255.59	9311.26	30143.5	8291.18	6272.95	10813.5	23016.9	9117.96	6126.92	17274.5	7419.88	11216.8
bad	576652	t12	2044	3	7	4386.9	6482.79	4248.53	18239.2	8179.84	4791.59	39284.1	8784.47	19330.8	14499.5	11730.2	3021.01	8492.98	8932.26	18622.2	103909	3616.07	8355.12	2457.58	733.513	27758.3	5036.91	3740.8	7529.43	8333.18	8541.79	9364.2	26412.7	9032.81	9984.08	5969.83	15273.1	5405.56	14478.6	30784.9	11121.3	7462.16	13888.3	39903.7	8737.41	8811.98	16783.6	8786.13	11593.1
bad	250434	t0	1173	3	1	4986.35	7863.45	1340.28	20572.1	11762	5362.07	19161.8	10925.4	18498.4	27474.4	10726.4	2988.74	9170.45	8826.27	24635.8	163601	4958.37	9050.03	3431.92	921.518	13410.4	4838.3	2640.56	8161.37	6208.45	8353.41	6792.47	35695.7	8968.11	11561.7	2303.86	13970.7	3514.46	8142.52	49166.3	19174	21603.5	16828.7	27892.7	10406.3	10519.2	44845.5	14003.5	14611.3
bad	250434	t3	1282	3	1	4598.12	7148.57	3318.03	19935.7	11717.7	5195.62	48611.9	9316.68	21645.5	21224.9	12372.2	3562.45	10189.5	11876.5	33946.7	215267	5173.83	7270.02	1405.31	296.658	11871.7	2007.97	1325.24	3190.4	5683.74	9520.68	5513.25	18420.6	4504.79	8639.35	2000.9	7357.44	4539.86	12913	64746.8	12556.5	14631	15243	78580	6739.11	8989.29	42655.8	11158.2	13586.9
bad	250434	t6	1415	3	1	3879.32	6944.22	3395.56	22462.4	9599.62	5426.17	32034.5	12240.9	23594.3	27197	10777	3563.95	8711.57	11487.3	22384.3	180488	4265.48	6841.88	1738.68	451.206	15562.7	3066.16	2143.91	4803.65	5608.56	7972.17	6893.92	27007.6	6269.18	9683.22	3069.39	12453	3802.23	10763.5	46663.4	13818.5	13391.4	13820.4	78659.2	7040.41	8550.22	41216.1	9498.73	12814.1
bad	250434	t9	1567	3	2	5909.23	10631.1	3180.4	21895.3	12823.1	8376.39	32741	19038.8	41538.6	30564.7	13360	4046.41	12540.3	13500.8	34534.1	335183	4679.88	8286.84	2844.15	642.524	15635.4	5232.57	3606.2	5450.84	8795.77	13183.5	8782.25	43275.2	6734.24	11899.2	6744.19	18462.1	4305.4	17616.1	55538.9	11023.3	21616.4	18047.6	68425.7	8548.8	11948.8	42099.3	11826.7	17299.8
bad	250434	t12	1717	3	2	8654.65	13803.4	3877.12	32119.9	14793.8	13870.6	49149.7	37112.5	79340.9	38265	16814.5	5592.23	20188.6	36265.6	39534.1	363277	11563.4	9698.57	4119.69	944.529	27322.8	9413.19	5309.92	8427.95	23441.6	25315.5	14616.3	57216.4	7127.1	19870.8	14131.2	37505.4	7534.35	26184.4	86095.7	20908.1	23343.5	21932	98966.9	11303.6	15721.2	46746.2	15495.4	24282.6
bad	250434	t24	2587	3	2.5	9236.82	11039.5	6240.74	31275.8	18607.5	10934.8	90827.4	34376.5	75421.7	47961.5	21576.9	4785.32	29162.3	31550.5	68226.2	650141	10454.2	10526.2	4316.48	1015.02	34076.1	8896.52	6271.52	9311.64	10477.4	13009.1	13184.3	57869.7	5143.2	26862.8	4366.88	27329.7	9088.53	27127.5	66509.2	17920.5	20576.2	15594.2	71382.7	11805	13962.4	25170.5	15110.4	19045.2
bad	722520	t0	741	3	5.5	7299.05	9115.68	2040.96	28774.7	10400.1	5661.62	67470.4	16478.3	44162.5	20892.3	12137	4860.62	14991.8	16699.2	34695.2	112584	8890.25	12771.1	1333.11	596.304	3179.93	1415.32	958.842	1494.32	7458.75	5079.57	5197.45	22436.3	3807.7	5364.76	643.499	4634.93	5901.58	16330.3	46300.5	16183.6	14727.9	15523	18932.6	14154	7412.23	18581.7	10909.2	14788.3
bad	722520	t3	957	3	6	9484.68	13987.2	2213.63	36337.7	22132	8938.45	38146.2	17528.4	40235.2	33341.8	19267.9	5150.5	15914.8	15975.6	38887.3	147366	9533.97	15774.6	4324.38	1681.81	100149	7377.65	6225.75	8147.33	13713.2	16265.2	15179.8	53980.2	15028.9	34397.1	10507.5	23829.3	7841.41	32515.3	80336.3	29082.3	24022.3	20231.8	85724.2		13913.3	27349.3	15137.6	24154.3
bad	722520	t6	1126	3	6	6895.55	12537.8	1228.92	27640.8	11875	6179.12	14302.8	12544.4	34379.1	27762	13233	4314.93	7868.82	12077.3	19489.2	102453	5746.23	11268.4	2936.37	972.579	29850.9	7512.34	4425.5	7138.55	11922.6	14982.7	11393.8	39808.3	16000.1	23248.3	13264.5	20192.6	5924.54	27971.7	89338.8	20176.8	28247.2	18510.7	74146	14024.3	12597.8	36956.9	14154.6	22901.2
bad	722520	t12	1309	3	6	4704.32	9782.32	2399.19	26778.3	11310.5	5597.05	7606.93	11437.9	26172.6	24050.8	10322.7	3795.82	8261	9811.01	16678.9	57409.3	3573.92	8210.65	1728.07	712.823	18017.6	5177.07	3703.44	3831.79	8873.64	12086.4	10169.6	34322.3	12005.8	14159.3	8420.22	20053.3	3878.77	22272.1	71396.2	18385.8	19914.4	21830.2	57915.1	9632.48	10011.7	30791.3	11446.5	23803.9
bad	722520	t18	1601	3	6	4759.72	6622.81	3288.44	31049.7	11607.1	4384.11	18084.4	8382.98	21298.1	18549.6	11932	4095.48	9157.05	8728.58	21716.2	61622.4	5020.87	9868.2	1638.95	783.614	29992	3755.98	2964.57	3733.53	5851.9	7458.69	8761.06	31554.7	6216.46	16981.5	5202.33	14377.2	3325.44	18203	30554.9	14992	14337	11648.5	24752.4	2310.5	5741.61	37629.4	10972.6	17296.7
bad	1210986	t0	1195	3	1	5025.67	9088.35	4223.66	33295.9	12952.9	8342.38	19384.8	16418.5	30708.1	21749.9	22529.5	4321.15	12439.9	12515.1	29701.3	93050.2	5356.2	7372.9	1914.53	863.467	24581	5570.98	4012.57	7687.83	5266.85	8564.72	9949.55	28916.1	8578.26	23711.5	1601.8	24087.1	6313.98	10095.1	55117.5	13739	10253.2	13226	24949.4	9501.45	5300.9	35836.4	12593.5	13100.5
bad	1210986	t3	1302	3	0	9202.14	13875.1	22320.7	42055.3	13214.2	13111.1	122573	37622.4	80853.6	28466.7	32477.1	7657.67	18925.8	23593.8	39701	184466	12553.6	11237.1	3475.82	1284.57	1.01919e+06	9911.9	5785.87	12690.8	11056.6	16469.3	13100.4	43358.4	11403.9	60801.4	6571.56	41471.9	9064.83	12086.7	73350.4	19675.7	20240.9	19113.2	48907.1	10757	8193.69	48777.5	15087.2	21399.1
bad	1210986	t6	1430	3	2.5	6741.98	7634.61	4527.03	29044.7	11103.2	11363.3	25984.8	27780.3	54950.2	18609.8	24726	5733.24	12337.5	17730	25793.9	122672	8425.08	7144.29	1889.56	782.894	101645	8635.8	4190.75	8288.44	10431.1	10749.9	7218.01	31438.9	4415.71	25928.3	6658.37	24653.4	2922.4	10787.8	49743.1	11521.4	14091.4	12050.1	26538.1	9617.15	5761.5	44823.6	11732.8	15291.6
bad	1210986	t9	1605	3	2.5	8116.62	16122.9	3635.4	36337.7	13656.7	9592.11	29121.1	21690.4	45668.4	26919.7	29067.1	6862.27	15860.7	13120.6	36585.9	185514	10944.7	21090.6	2225.67	1325.14	70825.9	5207.65	3017.09	6322.47	14619.3	15257.9	11581.6	45032.5	10663	17545.8	5296.41	16159.1	8285.09	14933.2	67791	22861.1	17586.6	18984.3	44660.4	12657.7	10827.3	51293.8	13004.2	17247.4
bad	1210986	t12	1790	3	2.5	7145.21	13089.2	11137.8		14356	8973.47	125008	14149.1	35400.6	26139.3	28367.8	4897.76	13430.9	11111.5	26923.7	90329.3	5480.57	16820.1	3662.31	1691.4	66135.4	8612.1	4467.68	14182.7	8333.18	11878.9	17521.6	36848.2	22968.8	71802.7	4442.93		11994.1	17871	60549.8	16898.6	15072.7	18655.8	43357.1	11378.5	9140.41	28721.2	10083.9	12938.3
bad	1210986	t18	2347	3	2.5	4922.18	10093.8	3613.84	28081.9	10642.3	3633.59	8354.22	6904.75	19354.8	18312.5	21660.2	3919.1	7755.13	6319.31	16978.4	51869.7	4413.28	14655.7	3909.51	1241.99	16971.5	7248.05	3582.27	9470.84	7451.4	7700.77	10175.4	26668.6	28063.4	39984.3	8356.57	16815.7	6695.16	15564.1	46140.4	13686.5	11808.8	9557.75	30721.1	9078.58	5773.16	34279.6	8022.92	13237
bad	1247950	t0	1240	3	4	5584.39	15404.1	6484.33	21386.5	13084.1	5588.13	11091.6	12133.1	27733.7	32652.9	24172.2	3987.85	14156.9	9934.08	29343.5	205305	4910.69	8325.01	4077.08	1098.3	50412.1	8350.84	6142.6	12072.5	6615.45	9493.93	13501.9	24422.5	24023.1	19453.7	4496.33	40771.7	6436.1	18387.3	61830.1	15159.7	12006.8	21632.9	67572.6	7855.6	5748.63	35370.8	13595.7	14593.4
bad	1247950	t3	1369	3	3.5	8394.33	15610.9	743.939	28929.1	9044.48	11327.9	10787	22856.6	72445.7	41008.6	29813.3	7663.78	11289.1	45537.2	17814.7	136924	6591.62	14054.5	3296.47	505.112	68913.7	8734.28	5204.43	7837.19	37658	52241	21119.5	23851.7	28388.6	4674.92	73238.9	42701.7	7358.24	39376.8	176278	13834	24317.9	32334.7	319743	7672.06	20354.6	59513.2	22613.8	45733.8
bad	1247950	t6	1538	3	4.5	9416.53	16232.3	1184.25	28444.4	10508.5	14627.1	19897.1	29418.3	92980.2	40568	25648.9	7495.77	14758.6	50364.6	23033.7	131628	8620.41	15107.8	3138.95	685.524	109213	12881.9	5376.93	9566.31	29608.4	42746.8	20320	19543.8	18365.1	14908.1	48187.6	51405	11318.4	38249.4	162188	14006.7	18065.7	29185.5	264240	8542.53	16996.6	36548.9	20087.8	31351.1
bad	1247950	t9	1712	3	2.5	12764.1	18315.6	15652.1	40538.5	18059.9	21119.1	40584.2	57974.1	142135	45489.9	37486.9	10498.2	28492.9	70468.7	60960.3	558799	15740.5	20429.4	4198.67	700.852	140553	14134	6918.28	11259.5	29981.3	40871.8	22344.6	40767.2	14846.2	15727.1	31625.7	68740.4	12231.6	32677.5	135983	23540.4	35483.6	27509.5	277623	10696.2	20913	46636.8	23892.1	31331
bad	1247950	t12	1937	3	2.5	14406.4	17201.3	12509.2	29443.8	10094.3	21951.2	38595.7	84180.1	161630	37621	28001.2	10157.2	28685.2	55739	49454.5	467295	19777.9	13922.6	3954.06	1052.95	99153.4	16584.9	6506.15	12738	26241.2	32810.1	18830.3	49281.4	8116.86	13195.6	28430	67049.6	7459.42	41266	195769	32935	32518.2	34438.7	262408	12097.5	15997.2	37804	25236.9
bad	1247950	t18	2524	3	3.5	10853.2	22969.8	12469.2	32193.5	11709.5	18788.6	11093.5	33785.1	4744.57	45347.5	26604.2	7385.59	22999.7	60280.8	31269.2	167294	572.909	18701.6	2125.36	252.747	42020.1	6168.69	3089.64	4383.24	159785	41267	11282.7	18588.4	10567.9	5904.81	23841.8	36431.9	6579.38	38143.8	271773	22557.6	31731.4		419029	11042.6	29699.7	34495.2	25387.4
bad	511754	t0	343	3	5.5	4622.28	14833.7	1715.01	33344.6	10007.2	3787.28	12570.5	5729.53	23527.9	24796.7	20941.8	3854.9	9145.58	8002.43	26146.6	156993	3545.48	9921.66	2774.61	2080.76	14005.2	3949.23	2549.68	7933.28	7287.99	4573.29	5981.93	27599.4	14425.2	18658	2042.63	15187.2	6434.12	12684.9	47209.7	15063.6	10991.6	12526.9	42179.6	7758.54	6965.51	26516.6	10111.5	15694.5
bad	511754	t3	532	3	5.5	7361.18	14807.9	4064.04	39746.6	11822.1	5318.06	9406.61	11464.9	61950.3	38589.3	20096.7	4371.79	9620.7	43406.3	27386	163903	7541.52	21926.3	3339.81	2003.11	35700.3	6110.68	3804.31	7681.33	35903.2	37233.6	13712.4	27981.9	19210	25353.9	33403.5	34269.7	9399.34	28939.3	96313	18818	22262.5	28886.6	176510	9319.5	11895	29728.3	16165.5	36752.7
bad	511754	t6	709	3	6	7412.32	16630.6	7125.12	42509.2	11846.4	8066.74	11230	14855.3	100434	1234.21	28728.9	4810.35	13755.5	46926.6	31941	163155	8544.46	22298.5	2306.6	651.25	47795.5	8220.84	4557.28	8900.89	26858.6	40599.7	21155.1	25497.6	22920.8	29109.3	39736.1	47233.1	10973.1	12983.2	127177	10843.2	15146.8	29058.2	160155	8200.47	17067.4	54740.2	13848.2	28206.2
bad	511754	t9	916	3	6	5530.74	10825.5	2691.89	61862.4	13157.1	5854.72	11744.2	10114.3	43421.9	26199.5	25426.4	7020.44	12030	14965.2	33095.5	172330	6217.39	14705.6	1916.49	1091.77	15285.4	5354.67	3494.76	8040.71	30410.3	7504.79	9531.57	23035.7	12202.6	25354.3	7371.63	28666.4	12708.8	6728.98	41761	10239.4	10104.3	12324.3	50244.9	8365.84	5925.99	47022.3	12414.1	12906.1
bad	511754	t12	1019	3	6	4921.49	10609.3	2012.94	42336.3	9411.67	3913.58	13114.7	5215.84	25046.2	17705	20959.3	5296.02	9537.85	8231.25	30573.3	67271.9	4094.62	9867.73	1554.13	1280.12	8257.09	3710.93	3163.51	9129.73	7422.7	4368.31	4530.85	19080.8	8105	16270.2	7921.38	11551.4	8668.39	6518.07	28403.2	9219.46	8309.66	7646.91	21500.8	7804.24	3597.26	45070.5	10345.2	13301
bad	511754	t18	2175	3	6.5	8234.37	10970.6	4500.17	43383.1	9534.44	8264.01	20035.5	14966.6	56533.3	18613.2	14468	4869.01	11716.4	12563.8	28360.3	148131	5975.26	11969.9	1287.95	527.695	28536	5215.54	3317.04	12219.1	6253.24	5674.43	7161.13	20210.1	8492.38	23384.9	5854.04	14156.1	5816.29	8877.79	37738.1	22098.9	16421	13882.2	23528.3	8635.01	6479.62	44658.9	12735.6	14530
bad	511754	t24	1587	3	6.5	7002.37	9432.64	5319.27	41225	11631.8	10934.8	27004.8	26462	169919	33169.7	30258.6	6042.7	17687.3	51614	51377.8	243892	9907.75	15256.9	1162.84	814.815	23439.3	7864.63	4667.68	5423.37	43365.9	22167.2	8678.18	25310.5	4467.26	17794	23655.8	18956.6	9670.97	17382.2	120748	17931.4	16853.8	28399.5	182929	10292.8	16289.1	54214.7	18193.1	28747
good	1126381	t0	390	3	0	5658.24	11219.5	839.445	21160.1	11109.6	8353.17	81020.7	18260.2	35789.7	27519.3	27608.8	6372.89	18427.7	22344.5	45742.4	225018	8909.81	11085.7	2713.37	1614.9	88935.7	11691.5	7179.65	11236.2	12583.9	9380.59	9212.18	69685.3	5355.21	66646	9812.9	19182.9	10836.1	10450.6	55318	21125.2	12754.6	17826.5	62875.7	10687.5	9633.06	74216.5	12815.7	17800.5
good	1126381	t3	594	3	0	7168.52	12949	2294.26	23280.3	13427.5	8760.22	46935.4	21206	40764.2	28836.5	25101.9	4842.48	17012.8	17080.7	33689.4	373815	9805.53	9497.96	3750.26	1415.27	123093	14375.3	7028.32	10298.5	10350.8	13932.1	13442	42504.1	9866.76	93313.3	9052.8	36099.5	6982.61	13237.4	60716.2	20385	10188.7	21347	85563.9	10032.3	9002.59	56804.9	11568.5	16735.8
good	1126381	t6	749	3	1	6062.13	12077.7	2085.4	24795.5	11407.4	7729.57	48848.3	16240.9	36492.4	29994.5	28734	5111.31	15247.7	20397.3	34460.5	325578	10107.3	12315.5	3411.06	1618.15	74443	13661.6	7842.27	12729.8	21585	23540.8	15796.3	43456.8	11833.7	94239.5	14282.6	31797.4	10198.6	26637	93282.8	23239.9	19653	27075.4	119131	10335.2	12370.7	45719.9	18937.6	20906.2
good	1126381	t9	962	3	0	4767.43	6278.39	2003.35	24064.1	7889.84	5605.79	37490.6	11924.9	26043.2	21767.7	17666.5	4111.4	10558.5	12074.9	24289.6	226461	6256.42	9318.67	2216.26	782.686	45179.2	7488.8	5368.74	7008.59	6419.38	10533.6	10126	18202.3	10113.6	33931	4793.11	22664.5	6328.91	12942	59192.5	14358.8	17668.6	16121.6	37037.9	9154.67	7273.19	41402.6	11665.5	18008.9
good	1126381	t12	1069	3	1	3381.32	4378.92	3932.52	20663.5	6400.79	4635.16	69931.9	8888.93	19592.5	17259.8	19078	4197.14	8603.17	11215.5	22084	195582	5171.78	6814.87	1403.55	473.607	61537.8	4774.62	3323.57	7311.78	5437.27	6191.83	5546.47	19282.4	5125.04	32460	2462.53	15312	5811.4	12265.2	40694	11733.5	14101.8	12203	28069.6	6826.63	5249.07	31385.5	11722.2	14337.5
good	1126381	t18	1372	3	1.5	5840.12	13257.1	7614.22	27200	12149.2	9479.56	53737.6	18854.5	48295	26339.3	29911.7	7820.76	17940.7	20509	37291.9	174296	12528.7	13023.6	2591.23	1083.33	62448.4	8353.61	5247.09	11006.8	7736.23	13913.6	14927.6	43773.1	12024.9	49107.1	3899.28	33650	6811.03	31966.3	94943.9	24966	22735.9	20119.7	68572.7	11987.7	11962.5	60553.3	17014.1	24028.4
good	1126381	t24	1696	3	1	7313.14	10385.6	2975.04	31353.5	17881.1	9723.77	54950.2	23970.1	42098.4	36406.8	34281.8	6192.24	24546.8	24772.1	50365.3	568223	11500.2	11228.3	3009.58	1324.11	29410.6	9384.76	6508.53	8212.73	18206.5	16435.5	14778.9	53146.3	6891.97	46651.4	9019.97	31205.9	9522.04	27395.5	84086.8	24965.2	21185.6	20964.6	47201.8	11643.4	12498.9	37486.7	15050.6	19152.9
good	1193197	t0	1312	3	1.5	5287.88	4594.07	6100.76	14038.1	4523.3	6094.2	91423.6	16540	70809.7	23436.2	14430.7	3367.48	7376.79	29150.8	10832.7	94969.3	5395.89	5848.08	646.89	214.637	142517	6232.36	2999.44	4912.55	23880.4	17516.4	8603.53	9529.62	2510.8	8210.51	11126.5	13574	5349.12	12603.7	73758.5	5666.88	7938.47	17545.7	138473	3363.34	8535.97	24524.3	7365.03	15318.7
good	1193197	t3	1465	3	1.5	7602.09	10975.1	4466.19	21777	8593.8	6649.27	56573.4	26982.9	101826	30911.1	27477.4	4380.21	10151.7	30037.9	22376.6	280359	11201.7	10823.3	1789.22	512.25	4284.89	3541.71	896.956	2431.89	44147.8	23512	9864.84	31309.1	6275.71	1991.59	8242.91	8368.61	5559.51	30833.6	100344	13813.1	27746	28321.7	175874	7302.69	14768.2	50641	14631.9	30148.7
good	1193197	t6	1586	3	1.5	6079.62	10636.3	4255.69	23125.8	9795.21	7649.08	23006.1	30205.7	36507	29652.7	27344	3598.84	11685.9	14683.7	20579.4	323877	7386.35	9030.36	2931.14	1036.44	80383.6	9705.65	5566.66	8379.39	11453.3	13986.7	11157.2	38459.3	8747.85	1328.61	5676.18	33781.9	6580.24	14291.5	59435.7	15870.3	11565.8	16310.9	63683.1	8958.53	10422	40113.3	14463	15117.2
good	1193197	t9	1787	3	1.5	5025.57	11174.6	4183.48	23213.9	11375.5	4550.59	58834.7	12205.4	32993.4	33696.7	28492.3	3580.84	12272.8	18104.9	24232.9	371739	7877.73	10422.3	2397.98	919.107	32807.9	8097.87	4953.87	11025.8	18814.4	18161.2	13242.9	25634.1	12474.6	2239.3	5491.08	21901.4	7620.29	9679.69	74615.8	14897.7	12188.6	21595.4	116561	7593.16	12109.8	51566.6	17488.9	15789.5
good	1193197	t12	2011	3	1.5	4751.75	9472.68	2118.58	27327.7	13524.1	5077.17	15542.7	15369.5	30217.7	30092.1	34722.9	3492.9	14360.9	12432.3	33150.8	535163	10723.8	8249.33	1139.58	370.364	13096.9	2781.21	1481.7	2715.54	10790	13919.4	8245.42	15930.7	5408.77	458.122	2704.85	10987.1	5577.77	10308.4	58534.5	16569.6	9516.18	20474.3	86021.9	10040.3	11319.7	37388.8	20467.8	15064.8
good	1193197	t24	3049	3	1.5	1636.85	9276.94	25681.6	16308.2	3805.35	2498.42	74443	11374	55089.1	11834.5	18969.8	2712.15	6987.73	8568.48	6958.36	61898.5	10045.5	13906.7	932.501	514.597	22040.7	3809.11	919.404	1615.14	7455.7	3649.54	8777.1	11799.4	2567.5	2629.15	7306.65	11012.4	12970	11724.8	41583.8	10013	7349.24	11751.7	62684.4	2024.39	15951	89009.1	4905.05	9473.79
bad	1215235	t0	1370	3	2	3427.09	7019.3	1329.09	26503.7	8166.12	3823.27	19656	8582.49	19526.4	22043.3	28914.4	3899.19	9688.04	11112.2	20657.5	249769	5260.37	6254.84	1542.27	481.318	6055.48	3056.43	3214.25	8988.14	5142.86	6760.65	5666.02	28259.5	5836.4	3445.12	2059.2	10110.5	5924.31	7183.95	39739	10196.5	7337.46	12201.3	54724.6	6217.98	6368.8	63110.8	14747.6	12737.9
bad	1215235	t3	1498	3	2.5	7302.67	12165.2	2004.73	25634.8	9240.3	7705.29	53010.5	24880.1	37493.1	18791.3	33251.8	5093.94	15596.7	19689.5	29298.9	445650	10512.9	8913.9	1961.55	634.017	5588.9	7014.09	5396.82	10622.5	10129.6	8773.7	9623.44	45929.6	4311.99	4985.83	4236.89	34338	7390.59	13802	54351	17710	20052.4	17065.8	65244.2	8918.56	9637.99	75937.1	12103.1	19731.8
bad	1215235	t6	1781	3	2	7910.04	9099.65	2186.92	24147.1	10151	8417.18	92555.7	35207.1	71803.4	30746.8	37752.3	4732.62	19874.3	27955.7	29117.8	470321	11607.7	8223.41	2165.79	408.771	80083.4	8069.99	4931.8	7536.34	14385.7	8536.44	8085.05	48423.8	2805.71	4606.05	5092.47	27648.5	6547.26	16045	48387.4	16064.9	17257.5	20761	81258.4	9008.7	7377.7	57839	10248.4	16261.7
bad	1215235	t12	1946	3	2.5	7810.41	17655.4	1369.72	31907.5	8886.46	7969.28	49927.5	22102.1	69043.2	30395.3	28153.3	4003.54	11441.3	27092.3	20239.2	148391	10529.3	14788.5	1237.66	370.805	10189.5	1706.47	1080.6	3225.55	21911.2	8709.69	6964.7	25388.2	2913.13	1167.04	1373.01	6186.98	9836.12	22022.2	79813.6	11395.5	16897	20024.1	120798	8975.8	13668.6	30029.7	10291.8	24676.2
bad	1215235	t18	2491	3	3	6848.33	17028.2	5896.15	28157.8	15134.4	6643.88	44472.5	18074.5	47175.5	26994.3	40613.7	4044.95	14987.3	24138.7	26502.5	302201	10262	15226.2	3412.03	791.942	22846.4	8981.39	4619.93	11161.3	31698.3	24253.4	15650	38127.4	12542.8	10651	22111.6	30314.2	17474.2	32285.2	95825.4	13275.8	17334.1	18948.1	164272	9036.22	14775.9	21504.2	10895.3	23273.1
bad	1215235	t24	2898	3	3.5	4120.25	7123.64	2452.44	16741.7	4581.5	2922.41	19654.7	8641.54	22389.9	16653.4	17665.7	3389.98	5466.34	18605.1	9467.99	144286	3389.2	9989.37	1699.79	380.596	32907.2	4112.44	4105.31	10944.5	18012.1	16392.6	8011.4	20432.3	11220	5276.9	14521.3	17189.4	6971.48	16169	60827.1	9401.68	12455.7	11491.2	86426.6	5686.74	9318.28	20202.2	7565.47	20650.9
bad	1192260	t0	534	3	1.5	3865.63	7267.35	2082.43	40827.2	10056.3	3823.27	7885.5	8441.79	16642.9	16418.5	20347.1	3379.44	11107.8	6268.16	22947.4	167439	9010.49	9701.46	2467.23	867.662	47329.4	3879.84	3645.49	7312.56	2837.94	6465.24	8523.17	32711.7	10139.4	19162.6	2165.46	18982	8062.04	21933.1	39081.4	12248.6	12503.9	12648.2	30726.9	9513.62	5404.17	15593.9	11112.6	18728.3
bad	1192260	t3	733	3	1.5	5212.74	11002.8	2751.26	46520.8	11605	7490.85	5158.09	16156.1	45946	30128.1	27599.6	6253.87	14369.2	22726.2	20114.6	167626	13029.9	18077.7	2326.01	908.758	30307.6	6310.92	3723.5	7427	25378.2	28327.2	15849.4	28225.1	14926.8	24333.3	20194	26229.7	10513.8	41984.2	125472	18166.3	20913.5	23409.5	180955	11299.1	12278	26437.4	16149.5	33426.5
bad	1192260	t6	936	3	1.5	5293.86	10604.6	7696.08	45779.5	15440.7	7875.04	8199.31	19726	39161	25330.8	31638.3	4873.1	15713.4	12496.1	30071.9	234444	11821.5	13664.9	2346.18	834.652	43140.2	6772.43	4271.64	7183.96	10126.9	15021.5	12850.3	33115.3	9034.07	32788.1	8236.9	31217	8119.76	40497.9	79751.3	19755.2	12585.4	17567.5	89419.8	13826.4	7277.11	17231.3	13867.3	21820.1
bad	1192260	t9	1101	3	1.5	6428.78	10359.4	5833.75	34797.7	6470.87	10738.8	6505.52	60781.8	117835	29515.3	16868.8	6236.5	11219.4	42989.6	15928.6	107850	12963.9	12371.4	1356.42	383.102	42818.8	10721.4	4972.51	8461.31	40974.7	53250.5	14682.4	21696.9	9588.41	16256.5	36919.7	35149.6	13904.6	32705.2	143443	9480.27	22922.3	19852.7	175015	8536.04	11794.2	24465.1	12451.1	37705.8
bad	1192260	t12	1203	3	1	10019.7	11143.7	11994.1	34621.6	12455.9	17308.6	38899.4	49946.9	110052	10143.1	34381.9	6254.7	14027.8	31718.2	21136.7	312009	12893.3	9908.58	2555.33	651.764	221861	12552.5	5873.01	6183.83	27240.6	24281.3	14486.6	41107	4358.67	28034.3	25997.9	31198.5	8742.84	34719.7	100202	15273.1	30901.7	19698.4	248273	9712.42	9977.35	25669	12934.3	37405.1
bad	1192260	t18	1457	3	3.5	4701.46	10648.6	2954.69	43826.8	8900.64	5407.14	10478	11534.5	34577.1	19396.2	28266.9	4515.05	14453.6	8367.51	30791.3	150426	8449.58	16801.1	1508.4	789.533	16771.8	3583.63	2325	7654.51	4256.47	5357.01	7258.83	27398.9	6310.31	12090.1	1359.69	9577.46	13626.4	16219.3	26222	11058.8	11340.6	9179.38	21888.7	7831.27	3771.39	29475.4	10607.9	13582.1
bad	1192260	t24	1784	3	2.5	9427.6	18771.1	1766.19	18649.1	15345.4	7980.93	11811.7	17266.8	32328.1	23078.8	33597.2	5021	15597	10436.2	34133.4	182603	11900.7	19971.8	4565.7	1745.47	90845.9	8926.21	6337.63	13765.7	7888.2	15614.1	17026.7	66182.9	20341.9	27627.5	5561.23	36845.7	8217.45	22426.5	54872.9	15956.4	24474.7	13341.3	32782.6	9255.39	6090.76	42598.2	17549.6	27834.5
bad	998788	t0	1348	3	5.5	3954.18	9078.21	3300.93	27921.1	7286.44	2840.82	36029.7	5812.46	19362.6	14864	16530.1	2401.48	7295.03	5469.87	11699.9	117452	3858.5	7889.66	1979.28	1018.07	42876.8	7372.86	3775.39	13605.4	6259.57	7362.45	10861.2	14745.5	17621	20769.3	2909.64	25069.6	11537.1	18703.4	38984.3	8345.65	8768.67	11658.9	26447.5	7321.29	5025.54	12894	8803.84	9778.32
bad	998788	t3	1483	3	6.5	9390.46	12161.1	4337.7	26296.3	9963.5	4076.72	28656.8	9680.07	28749.6	27540.5	12095.5	3049.87	7198.54	9605.46	11413.2	198143	9680.28	11507.7	2346.18	1007.81	49100.3	5630.6	3662.54	7155.24	16065.9	15621.6	10565.6		14170.8	9133.29	26088.5	16573.7	5014.16	30279.3	63394.5	12937.4	20445.4	15669	68178.1	10012.4	8152.89	20686.8	9841.86	20311
bad	998788	t12	1994	3	6.5	6156.34	15094	4435.14	37060.9	11898.1	6916.59	15905.5	14532.5	56628.5	46267.2	29713.2	5414.38	10705.5	21941.2	17557.5	119890	10367.6	15239.7	2635.98	955.535	27146.3	6170.38	5090.27	9047.3	33309.3	27257.7	16666	33837.3	18941.1	9375.98	25355.2	24918.9	8466.2	27497.5	108519	19288	23964.4	26444.1	135533	11232.8	14838.6	47397.5	18642.6	26324.5
bad	998788	t18	2559	3	7	6627.64	10970.1	5149.03	33488.1	14210.3	6914.65	10040.3	14974	48446.6	31999.9	34038.5	4291.49	13657.1	14467.2	19266.5	104361	11272.4	10800.6	2285.69	781.152	36137.5	8324.7	4906.74	8270.11	14557.2	13686.4	12854.8	26055	10049.5	10854.9	12593.5	16655.6	5578.5	36261.5	77561.1	11886.4	10294.9	19179.3	62516.4	10974.3	7770.5	31136.2	14879.5	14321.2
bad	998788	t24	2934	3	7	6912.94	8232.53	13270.3	31772.2	11331.7	7342.72	70138.3	22091.8	86174.2	31745.3	32078.6	4447.35	16596.5	23282.8	31098.5	117289	12524.5	14720.7	2104.11	687.419	18140.3	7956.5	4197.16	9169.31	25903.9	19765.9	12429.8	31809.9	8345.33	18799	23168.2	26220.3	11491	16594.2	72366.8	8658.61	10301.1	17172.3	67400.7	9130.02	8309.78	29385.7	10106.4	15246.2
bad	1132810	t0	410000	3	1	10353.4	11095.4	6951.19	28423.9	10933.2	13838.2	30052.2	47343.6	94301.7	28511.3	34584.7	6842.56	22720.5	28631.4	33045.2	294291	13321.7	13973.9	2256.18	993.477	131526	11158.6	6309.32	8727	13127.1	12890.4	13466	49592.3	6040.74	10509.3	4126.64	34328.9	9324.16	22841.8	64033.7	14954.1	15759.7	17892.1	79050.7	10410.7	10934.3	51531.8	14690.1	18571.4
bad	1132810	t3	613	3	2.5	7929.99	15454.2	7327.58	29448.2	9920.4	9462.51	21793.3	18009.7	43411.9	27155.3	24186.1	6158.71	14607.8	15469.5	19734.8	219328	10562.7	16373	1069.81	655.574	17987.2	3719.79	1867.73	3182.36	19090.2	8561.87	6673.53	24511.7	6687.61	3268.28	7213.52	13596	5514.03	32531.5	85932.2	10631.9	16787.6	17973.2	139420	9314.65	13976.4	77974.9	15477.1	25544.5
bad	1132810	t6	778	3	3.5	4796.73	14164.6	7713.68	22795.2	6784.37	3536.15	115555	8967.71	29227.3	20542.2	18453.4	5949.36	8398.24	11134.4	12509.8	82140.6	5384.06	19617.7	1757.82	1060.71	25081.4	5518.22	2633.23	10523.9	11716.2	9189.75	6528.64	15516.3	2406.65	12580.9	5529.04	20067	13478.2	25373	67589.8	10003.9	11965.8	16651.5	68099.4	8004.83	9004.98	41613.7	14907.1	12614.3
bad	1132810	t9	952	3	2	6201.69	17482.7	12273.8	38477.4	11908.7	5430.88	17631.5	11902.5	44140.9	24391.3	15577	4291.49	9105.43	26470.5	15946.6	222362	12857.5	23920.7	2368.65	1829.03	41793.8	17068.9	3773.21	8747.84	47923.5	31338.7		43552	11645.6	9917.92	21937.4	25871.2	8883.76	27417	110400	16902.6	16574	23902.5	165145	9735.03	19896	28303.4	13627.6	32882.7
bad	1132810	t12	1061	3	2	5336.61	8833.99	9791.7	37721.6	9681.16	5836.97	13576.7	12593.4	65375	33727.1	17420.7	6246.87	10334.3	24054	16399.2	230760	18963.4	24706.8	2291.16	898.188	52732.9	6356.76	3612.2	7994.83	143247	26802.4	18192	22337.6	21537.3	9005.68	28656.8	28065.2	12664.1	26717.2	118643	13399.2	19268.4	22780.9	187871	10737.7	23911.9	18332.4	16904.8	29576.6
bad	1132810	t18	1332	3	2	5084.42	11016.1	7508.1	44864.3	14112.3	5738.67	13215.4	19222.9	49754.1	31455.5	24684	5910.52	13520.3	15446.3	21208.5	259479	14867.2	20037.5	1588.3	567.283	31154.5	16761	4657.16	6800.48	71650.2	11451.6	10787.1	21941.7	16118.7	10480.7	13568.3	29778.9	5504.48	55390.7	89526	15953.6	15885.1	20274.9	102411	10569.9	14086.3	28478.4	14348.3	22039.1
bad	1132810	t24	1653	3	1.5	9151.02	22350.3	15258.6	41631	14179.3	3187.49	53480.1	17793.9	78324.1	52378.4	34253.7	7219.9	15740.5	28210.4	32261	322133	14494	22824.8	2104.12	1206.36	130878	12020.1	5636.12	10728.3	34841.5	18778.8	12180.5	30696.3	16160.5	24537.6	33369.9	24730.4	7791.96	40027.5	124910	20109	24431.2	20353.9	137912	14528.8	20796.7	38141.5	15996.9	30819.1
bad	1227358	t0	1234	3	3	7048.52	14991.6	1900.18	32370.2	15813.9	6801.48	69181.2	13497.9	35077.4	44049	34498.6	5498.39	16589.5	13208.8	42872.9	573978	11563	13460.3	3535.21	736.66	35158.3	10173.5	1800.7	3635.13	12418.3	8486.42	8847.27		5890.42	8920.95	3046.09	15357.2	8289.36	32431.1	58457.4	17687.9	25237.6	20196.5	58509	10467.1	12403.7	22460.1	10840.9	25685.4
bad	1227358	t6	1503	3	1	4424.3	5163.7	2478.25	37005.1	13002.5	5838.76	86916.5	19465.5	61073	26805.1	27748.9	4921.05	17095.5	17153.4	34750.5	698954	7546.7	11683.4	1558.04	399.68	21714.9	17472.4	3163.44	3663.18	13394.1	6126.05	5058.24	30493.4	2297.5	6119.11	5659.62	13624.8	8252.23	34966.3	41364.7	18343.7	23374.8	13699.6	57413.5	12200	7125.03	23344.9	8706.15	30371.4
bad	1227358	t9	1680	3	1.5	6502.76	6233.85	6227.72	38639.6	15057.8	8680.77	190168	16001.2	72213	27850.5	17808.6	4489.5	15150.3	29125	39030.6	343079	7631.94	12119.1	2713.93	1055.14	35036.6	15053.6	6686.88	12175.6	24785	22116.7	8075.42	38805.3	5270.69	8817.23	28889	14686	17982.9	15529.4	58238.4	14823.6	10692.7	14282.1	89358.8	8870.7	14321.6	32401.1	14494.6	22859.5
bad	1227358	t12	1845	3	1	7916.12	14644.6	4422.45	41717.2	15162.6	8862.54	82934.8	20202.6	143870	38909.3	21833.7	4343.54	13008.4	34237.9	28461.4	405802	14326.9	17002.2	2470.01	745.108	20661.1	3820.83	2663.08	3098.62	32957.3	27163.5	9896.1	35520.2	4034.07	2230.57	14260.7	9056.33	12613.1	21144.4	85612.8	14855.4	16884	18479.4	159742	10522.2	17659.9	39100.4	11806.5	30592.4
bad	1227358	t18	2389	3	1	7381.75	13479.7	2733.2		17552	7888.52	48746.5	16598.2	104751	30263.9	14947.8	3729.65	13857.3	15170.7	27444.5	242663	12667.1	13706.9	1428.83	502.887	5870.53	1802.04	1165.07	2306.68	7079.97	7427.59	6020.01	24341	2891.9	1829.24	3192.28	4131.29	17741.1	19740.7	46385.9	13383.8	10506.3	14360.7	71103.5	10468.6	7938.15	18626.5	8766.52	20842.8
bad	1227358	t24	2833	3	0	7433.53	19376.9	8149.08	65841.4	25996.8	9259.96	50993.8	14306.6	67097.7	40014.8	23976.3	5801.63	18954.8	15319.1	52423.8	372834	15389.4	28197.5	2574.16	1249.74	3733.03	5913.03	2725.23	8942.57	14092.8	10744.9	10850.2	46945.8	3531.14	2275.56	6386.55	8786.38	29929.1	24883.4	47826.7	14398	15071.9	15318.4	62949.6	11234.1	11691.2	26409.3	12114.3	25947.9
bad	1117161	t0	236	3	2.5	5224.41	13390.3	6199.48	28824.5	14585	9707.67	43241.2	11811	39212.3	21064.4	19557.4	4693.65	11731.5	11279.1	30708	404761	6271.31	14540.5	1890.31	777.513	8453.13	4109.22	1835.65	6031.07	5463.07	4847.07	6067.97	22716.7	5523.74	3891.7	2093.01	9293.52	34244.8	26919.7	63430.6	11981.5	13310	18229.8	38507.8	10273.1	9083.32	25790.3	17652.8	13730.2
bad	1117161	t3	416	3	2	7889.94	8917.83	8339.92	26351.7	13857.3	11608.2	56525.7	28366.9	84320.7	22948.3	15974.1	5445.24	12665.9	24919.4	29505.5	379771	10727.4	10586.7	4278.34	1124.44	77458	16000.9	6932.44	7493.41	15962	19827.9	12646.9	45604.3	8357.39	5674.04	19572.6	15831.7	12443.7	29963.6	95666.4	15925.2	22855.2	18546.8	99433.4	11303.5	13873.5	58476.4	13269.2	24347.7
bad	1117161	t6	576	3	1.5	5867.03	9625.36	3461.27	28254.5	15364.5	8431.59	19550.9	16558.2	38556.1	22577.3	14313.9	2692.42	12090.8	16927.6	26255.6	305306	7371.96	14095.4	4324.28	1328.92	36530.8	12960.2	5789.81	12769.3	16798.1	18259	13455.5	40769.8	9812.87	9303.95	12793.5	18080.2	21672.3	31597.9	66932.4	15442.1	20917.5	20397.2	59816.7	10426	11153.6	46066.7	13126.1	20147.1
bad	1117161	t9	793	3	3.5	8632.93	15974.7	3558.83	38503.7	15671.4	10894.4	40903.1	23571.7	67827.9	29681.2	20437.4	5107.17	14141.6	19613.4	28552.5	504382	12252.3	18082.3	4429.75	1247.58	23452.4	14495.9	6353.72	9395.22	11106.6	13848	17717	54507.8	14491.5	5881.52	9395.3	21173.8	17057.7	24505.2	71548.8	13827.6	17542.3	16014.5	57192.8	10464.2	8825.01	50473.4	14185.3	21219
bad	1117161	t12	960	3	2.5	9675.17	21140.6	7405.45	37152.1	20836.9	9293.66	74230.8	18130.9	68682.9	35904.6	14626.2	5873.15	11424.3	23930.3	24473.9	265617	12617	21293.6	5652.61	1816.72	98889.7	14414.4	6801.94	12487.9	27184.2	22661.1	17940.9	52962.6	19753.7	14829.3	23375.6	22896.2	22377.8	20300.1	75737.7	16826.5	18120.9	17891.7	68756.6	12843	13768.9	36871	13013.3	24896.2
bad	1117161	t18	1229	3	2	8550.7	14652.2	5134.59	36289.6	15546.2	5529.32	60997	13212.7	50970.9	21205.1	2321.87	4348.73	8701.96	13273.9	17266	237386	6958.21	16813.2	3703.81	1023.45	31567.1	7843.77	1917.3	8817.47	14445.9	11808.6	8961.2	36202.9	13357.2	5082.48	11422.7	15119.8	18986.8	28127.6	70587.6	18897.6	18740.8	15741.9	58484.3	11454.5	10394.9	28941.6	11611.4	24158.1
bad	1117161	t24	1535	3	2.5	5599.87	7808.29	15609	22529.5	8743.58	7733.73	81889.7	14178.2	48865.5	19991.2	18741.3	3939.01	7437.73	26812.8	23128.3	307222	7387.11	10167	3747.66	886.782	175103	16314.3	6637.4	8467.12	31122.4	30062.5	13163.3	29525	10522.4	15456.2	36444.1	13810.5	12163.5	29702.2	101836	10730.1	14311.3	19739	146972	7066.39	14165	14496.2	10065.5	26203.2
bad	1042455	t6	972	3	2	5135.36	8144.36	3507.49	28193.3	9461.59	4744.11	15057.3	10772.8	28279.7	22743.9	15492.2	3096.71	8413.33	17269.1	20866	168945	13054.5	10670	2670.23	989.239	30827.9	8288.87	4584.49	8038.89	24037.3	19897.8	12949.2	28281.6	7165.38	3153.86	16772.8	16196.8	7983.53	23621.4	64894.8	15835.7	14756.9	18252.6	92504.9	12641.2	11095.6	10064.7	13358.5	21480.6
bad	1042455	t9	1138	3	1.5	5542.48	10372.2	10630.9	28745.5	10719.4	5054.24	18313	11548.6	30115.6	27465.1	14449.8	3008.4	8137.87	10111.2	16564.2	146836	7537.38	6186.07	2842.49	1374.86	35670.1	7420.37	4436.56	9134.33	8306.75	9631.86	13742.7	34520.1	13425.6	8933.29	7102.06	25725.3	11217.1	37913.1	60876.3	19179	13860.6	17274.9	52195.8	13988.5	9118.28	8586.57	11442.4	17765
bad	1042455	t18	1530	3	2.5	8149.59	14168.7	16846.7	38430	14162.3	5749.33	40600.6	14451.3	38348.4	26129.4	13479.6	3404.96	7902.27	12670.3	17958.5	124707	9967.44	17260.8	3448.94	2811.16	90282.2	9551.98	7000.5	18654.4	11620.3	13854	19318.4	31084.7	15723.1	22852.1	12708.4	49098.4	16541.2	51015.5	88499.5	17753.8	13818.3	20646.2	89081.6	12425.2	10822.6	15945.2	12390.6	22192.1
bad	1042455	t24	1865	3	3	5969.4	12076.4	8324.9	54897.4	12555.2	3003.69	16964.6	9346.3	21333.4	23504.8	12913.2	3205.02	7690.86	10104.5	16186.1	90594.7	11465.9	13417.7	1744.34	1174.91	24954.3	5803.41	3505.27	7664.26	5698.56	6950.9	10899	17672.6	5779.36	3719.11	9653.89	29599.9	15124.6	35737.1	64121.3	15187.2	10687.6	12899.8	80618.3	12486.4	7812.13	14464.4	10080.2	15856.5
[truncated: 32 more columns]
